# Supplementary material
Source: ML conference proceedings conference paper supplement (https://proceedings.neurips.cc/paper_files/paper/2023/hash/52e78a95d8baa6d082fb2d0e9499b661-Abstract.html)
Supplement: Supplementary file 1 [file 52e78a95d8baa6d082fb2d0e9499b661-Supplemental-Datasets_and_Benchmarks.pdf]

---

# “SARAMIS: Simulation Assets for Robotic Assisted and Minimally Invasive Surgery” Supplementary Materials

---

Nina Montaña-Brown<sup>\*,1,2</sup> Shaheer U. Saeed<sup>1,2</sup> Ahmed Abdulaal<sup>1</sup> Thomas Dowrick<sup>2</sup>  
Yakup Kilic<sup>3</sup> Sophie Wilkinson<sup>3</sup> Jack Gao<sup>3</sup> Meghavi Mashar<sup>3</sup>  
Alkisti Stavropoulou<sup>1</sup> Emma L. Thomson<sup>1</sup> Zachary MC Baum<sup>1,2</sup> Chloe He<sup>1,2</sup>  
Simone Foti<sup>1,2</sup> Brian Davidson<sup>3</sup> Yipeng Hu<sup>1,2</sup> Matthew J Clarkson<sup>1,2</sup>

<sup>1</sup> Centre for Medical Image Computing, UCL, London, United Kingdom

<sup>2</sup> Welcome/EPSRC Centre for Interventional And Surgical Sciences, London, United Kingdom

<sup>3</sup> University College London Hospitals

\* n.montanabrown@cs.ucl.ac.uk

## 1 A Data Location and Code

2 We provide an AWS S3 bucket hosting the data, which may be downloaded from the following links:

- 3 • <https://saramis.s3.eu-north-1.amazonaws.com/abdomen.tar.gz>
- 4 • <https://saramis.s3.eu-north-1.amazonaws.com/amos.tar.gz>
- 5 • <https://saramis.s3.eu-north-1.amazonaws.com/total.tar.gz>
- 6 • <https://saramis.s3.eu-north-1.amazonaws.com/metadata.tar.gz>
- 7 • [https://saramis.s3.eu-north-1.amazonaws.com/rl\\_expt.tar.gz](https://saramis.s3.eu-north-1.amazonaws.com/rl_expt.tar.gz)

8 The data includes the original SARAMIS dataset, as well as the data used to replicate the navigation  
9 experiments detailed in the paper. The code is made publicly available at the associated SARAMIS  
10 repository.

### 11 A.1 Data Structure and Contents

12 Data is provided as a .tar.gz files. Within the S3 buckets are five subfolders - three constituent datasets,  
13 Abdomen-1k, AMOS and TotalSegmentator, the data used for the autonomous navigation (Sec 5) in  
14 the paper in a subfolder “rl\_expt”, and a metadata folder.

15 Within the Abdomen-1k, AMOS, and TotalSegmentator folders exist a number of sub-folders. Each  
16 sub-folder refers to an anonymised patient case, with matching names to the original CT datasets.

17 The following files are listed in the Abdomen-1k and AMOS subfolders:

- 18 1. .nii.gz: CT scan and label.
- 19 2. slicer\_segs: subfolder containing original .nii.gz files outputted from the TotalSegmentator  
20 model applied to the .nii.gz CT files.
- 21 3. auto\_seg\_pre.seg.nrrd: original labelling node, converted from the slicer\_segs to an individ-  
22 ual .seg.nrrd file, prior to the editing phase.
- 23 4. auto\_seg.seg.nrrd: edited labelling node post-editing phase.

- 24 5. analysis: subfolder containing the .npy arrays extracted from the auto\_seg files for the  
25 analysis portion of the paper, pre- and post-editing, and with filtering, such that they could  
26 be converted into meshes.
- 27 6. full\_meshes: subfolder containing processed meshes for every organ, derived from the  
28 filtered .npy arrays.

29 Within each full\_meshes are a number of sub-folders referring to individual organs and their assets.  
30 Each sub-folder, for a given organ, contains a number of files:

- 31 1. organ.ply: original meshed organ from the filtered npy array post-correction, extracted using  
32 a binary marching cubes algorithm.
- 33 2. organ\_laplace\_smooth\_mesh\_decimation.ply: processed organ file, laplace smoothed and  
34 mesh decimated.
- 35 3. organ\_laplace\_smooth\_mesh\_decimation\_centered\_local.ply: processed organ, centered  
36 in the local frame of reference (such that the organ is centered to 0 in it's own frame of  
37 reference).
- 38 4. organ\_laplace\_smooth\_mesh\_decimation\_centered\_global.ply: processed organ, centered  
39 in the patient frame of reference (such that all the organs in the patient are positioned relative  
40 to each other and globally mean 0 centered). Additionally, s-t coordinates for texturing are  
41 added to the mesh via Blender processing.
- 42 5. organ\_laplace\_smooth\_mesh\_decimation\_centered\_global.vtk: tetrahedral mesh obtained  
43 from the global centered mesh.
- 44 6. bake\_map\_diffuse\_1000.png: diffuse maps baked from Blender.
- 45 7. bake\_map\_normals\_1000.png: normal maps baked from Blender.

46 The formatting of the TotalSegmentator sub-dataset is slightly different, as it was not reviewed by the  
47 annotation team (considering that the ground truth labels from the original dataset were reviewed by  
48 a clinician and match the set of labels generated for the AMOS and Abdomen-1k dataset). Therefore,  
49 each subfolder contains the following data:

- 50 1. ct.nii.gz: CT scan in .nii format.
- 51 2. segmentations: subfolder with .nii.gz files labelled according to the organ the label corre-  
52 sponds to.
- 53 3. analysis: folder containing .npy array for analysis of structures.
- 54 4. full\_meshes: subfolder containing folders with meshing output from the ground truth  
55 segmentations. If the segmentation extracted for a given organ from the segmentations  
56 subfolder is empty, there will be no associated subfolder for that organ in the full\_meshes  
57 subfolder.

58 Finally, some subfolders in the three datasets contain additional folders labelled colon, which contain  
59 the results of the procedural generation process as detailed in the paper. This folders contain files  
60 such as:

- 61 1. bake\*.png: baked diffuse and normal maps.
- 62 2. Centerline curve\*.csv and .json: files detailing the output of the manual segment picking  
63 using 3DSlicer as described in the paper.
- 64 3. interp\_curve.txt: interpolated BSpline curve from the individual centerline segments.
- 65 4. indices\_\*.txt: points and indices (int) on curve or mesh corresponding to anatomy detailed  
66 in the paper.

67 We describe which patient cases contain procedurally generated colons in the metadata .txt files  
68 corresponding to each dataset.

## 69 A.2 Data Loading Instructions

70 The SARAMIS dataset contains multi-modal data that can be interacted with in different manners.  
71 Here we provide further information on how to load all the image formats supplied by the dataset.  
72 Code to load the data is also provided throughout the SARAMIS code repository.

- 73 1. `.nii.gz` and `.seg.nrrd` files: the NIFTI file standard (`.nii.gz`) and NRRD file standard, respec-  
74 tively, are common medical imaging formats, and can be loaded using the 3DSlicer GUI  
75 (via drag and drop), or using the python packages `niibabel` and `pynrrd`.
- 76 2. `.vtk`: tetrahedral mesh format, which can be read using `gmsh`.
- 77 3. `.ply`: Polygon File Format may be loaded using a GUI such as MeshLab, 3DSlicer, and  
78 Blender. It can also be loaded using VTK data formats, PyTorch Geometric, PyTorch3D,  
79 amongst others.
- 80 4. `.png`, `.npy`, `.csv`: common image and data formats that can be loaded with the numpy Python  
81 package.

82 The metadata folder contains a number of files:

- 83 1. `{dataset}_interp_colons.txt`: detailing the folders for each dataset which were manually  
84 processed to extract the centerlines for procedural colons as detailed in the paper.
- 85 2. `{dataset}_old.csv` and `{dataset}_new.csv`: files containing the pixel values per organ used to  
86 perform the analysis reported in the paper.
- 87 3. `exclude.txt`: comma separated txt file with case folder and reason why it is excluded from  
88 the dataset.

## 89 B Appendix - Datasheet for Datasets

### 90 Motivation

91  
92 **For what purpose was the dataset created? Was there a specific task in mind? Was**  
93 **there a specific gap that needed to be filled? Please provide a description.**

94 Laparoscopy and endoscopy are techniques in surgical and medical practice which involve inserting  
95 video cameras into a patient in order to diagnose and treat a number of conditions, and have made  
96 it possible to perform minimally invasive surgery (MIS). The benefits of MIS have been well  
97 documented [2, 18, 27], and can be summarised as follows: 1) Reduced post-operative pain, 2)  
98 Shortened hospital stays [27, 17], 3) Improved rates of patient recovery [6], and 4) Lowered costs  
99 to hospital systems in a number of interventions [2, 24, 17, 7]. Additionally, recent advances in  
100 robotics have enabled the pairing of robotic elements with laparoscopic equipment, which provides  
101 further benefits such as an improved ergonomic environment for surgeons [31] and the possibility of  
102 teleoperation [5]. In tandem, (partially) autonomous robotic surgery has emerged as an increasingly  
103 important research topic [4, 22, 9]. Indeed, many surgeons consider the full automation of robot-  
104 assisted minimally invasive surgery (RAMIS) as the ‘end goal’ of surgical practice [9].

105 Traditional computer vision applications have long exploited tracking devices and LIDAR-like sensors  
106 to create large-scale annotated datasets for relevant tasks such as camera-pose estimation or scene-  
107 reconstruction [8, 14]. However, these devices are logistically challenging to incorporate into surgical  
108 workflow, as they require sterilisation, consequently multiple calibrations, and are expensive to accrue.  
109 Overall, this has resulted in limited open-source datasets for computer vision tasks in MIS/RAMIS. In  
110 parallel, synthetic data and rendering environments have emerged as promising, alternative resources  
111 to enable computer vision at scale [20, 25], and are important for the development and testing of safe  
112 autonomous systems. However, *in silico* datasets for the development of deep learning algorithms  
113 and autonomous systems in MIS/RAMIS are limited in number and application [13].

114 The proposed dataset, “Simulation Assets for Robotic Assisted and Minimally Invasive Surgery”  
115 (SARAMIS), aims to provide the first large scale dataset of rendering assets for the tasks of MIS and  
116 RAMIS.

117 **Who created this dataset (e.g., which team, research group) and on behalf of which**  
118 **entity (e.g., company, institution, organization)?**

119 The dataset was created by researchers at the Centre for Medical Image Computing (CMIC),  
120 Wellcome/EPSRC Centre for Interventional And Surgical Sciences (WEISS), on behalf of University  
121 College London (UCL), London, United Kingdom.

122 **Who funded the creation of the dataset?** If there is an associated grant, please provide  
123 the name of the grantor and the grant name and number.

124 This work is supported by the Wellcome/EPSRC Centre for Interventional and Surgical Sciences  
125 [203145Z/16/Z]. NMB, AA, ET, AS, and SF are supported by the EPSRC-funded UCL Centre  
126 for Doctoral Training in Intelligent, Integrated Imaging in Healthcare (i4health) [EP/S021930/1].  
127 AA is supported by an EPSRC Industrial Case grant [EP/W522077/1], and a Microsoft Research  
128 PhD Scholarship Wellcome Trust award [221915/Z/20]. MJC, YH, NMB, and SUS are supported  
129 by EPSRC grant [EP/T029404/1]. TD is supported by EPSRC grant [EP/V052438/1]. ZMCB  
130 is supported by the Natural Sciences and Engineering Research Council of Canada Postgraduate  
131 Scholarships-Doctoral Program, and the University College London Overseas and Graduate Research  
132 Scholarships. This work is also supported by the International Alliance for Cancer Early Detection,  
133 an alliance between Cancer Research UK [C28070/A30912, C73666/A31378], Canary Center at  
134 Stanford University, the University of Cambridge, OHSU Knight Cancer Institute, University College  
135 London and the University of Manchester.

136 **Any other comments?**

137 

|                    |
|--------------------|
| <b>Composition</b> |
|--------------------|

  
138

139 **What do the instances that comprise the dataset represent (e.g., documents, photos,**  
140 **people, countries)?** Are there multiple types of instances (e.g., movies, users, and ratings;  
141 people and interactions between them; nodes and edges)? Please provide a description.  
142 Each instance in the dataset represents organs and anatomical features of the human body. Each  
143 instance is acquired from a singular human subject.

144 **How many instances are there in total (of each type, if appropriate)?**

145 There are a total of 2529 instances across the dataset.

146 **Does the dataset contain all possible instances or is it a sample (not necessarily**  
147 **random) of instances from a larger set?** If the dataset is a sample, then what is the  
148 larger set? Is the sample representative of the larger set (e.g., geographic coverage)? If so,  
149 please describe how this representativeness was validated/verified. If it is not representative  
150 of the larger set, please describe why not (e.g., to cover a more diverse range of instances,  
151 because instances were withheld or unavailable).

152 The dataset contains all possible instances.

153 **What data does each instance consist of? “Raw” data (e.g., unprocessed text or**  
154 **images) or features?** In either case, please provide a description.

155 Each instance consists of the following:

- 156 • Computed Tomography (CT) Scan: the original CT scan the data is derived from is included  
157 for reference and re-analysis. The CT scan is in the format of a .nii.gz file, a common



158 medical imaging data format. The CT scans were previously anonymised by the respective  
159 centres, and as such do not contain identifying information.

- 160 • Segmentation Map: two segmentation labels are provided describing anatomical features  
161 within the CT scan. Each segmentation map describes the voxel class of the CT scan from  
162 the following classes: the spleen, kidney right, kidney left, gallbladder, liver, stomach, aorta,  
163 inferior vena cava, portal vein and splenic vein, pancreas, adrenal gland right, adrenal gland  
164 left, lung upper lobe left, lung lower lobe left, lung upper lobe right, lung middle lobe right,  
165 lung lower lobe right, vertebrae L5, vertebrae L4, vertebrae L3, vertebrae L2, vertebrae  
166 L1, vertebrae T12, vertebrae T11, vertebrae T10, vertebrae T9, vertebrae T8, vertebrae T7,  
167 vertebrae T6, vertebrae T5, vertebrae T4, vertebrae T3, vertebrae T2, vertebrae T1, vertebrae  
168 C7, vertebrae C6, vertebrae C5, vertebrae C4, vertebrae C3, vertebrae C2, vertebrae C1,  
169 esophagus, trachea, heart myocardium, heart atrium left, heart ventricle left, heart atrium  
170 right, heart ventricle right, pulmonary artery, brain, iliac artery left (common iliac left artery),  
171 iliac artery right (common iliac right artery), iliac vena left (common iliac left vein), iliac  
172 vena right (common iliac right vein), small bowel, duodenum, colon, rib left 1, rib left 2,  
173 rib left 3, rib left 4, rib left 5, rib left 6, rib left 7, rib left 8, rib left 9, rib left 10, rib left 11,  
174 rib left 12, rib right 1, rib right 2, rib right 3, rib right 4, rib right 5, rib right 6, rib right 7,  
175 rib right 8, rib right 9, rib right 10, rib right 11, rib right 12, humerus left, humerus right,  
176 scapula left, scapula right, clavícula left, clavícula right, femur left, femur right, hip left,  
177 hip right, sacrum, face, gluteus maximus left, gluteus maximus right, gluteus medius left,  
178 gluteus medius right, gluteus minimus left, gluteus minimus right, autochthon left (erector  
179 spinae left), autochthon right (erector spinae right), iliopsoas left (psoas major left), iliopsoas  
180 right (psoas major right), and the urinary bladder. The segmentation files are provided as  
181 .seg.nrrd files, a common medical imaging data format. One segmentation label corresponds  
182 to the data pre-review, and the other label corresponds to the data post-review by a team of 7  
183 trained clinical annotators and 4 radiologists. From the above list, several structures were  
184 corrected in name compared to the original model's output (found in brackets next to the  
185 original label).
- 186 • Ground Truth Label: the original segmentation label from the original segmentation datasets  
187 is also provided for reference and further analysis.
- 188 • 3D mesh models (.ply): each label in the post-processed segmentation map is converted into  
189 a surface model representation in standard .ply format.
- 190 • Tetrahedral volumes (.vtk): each surface model representation is converted into a tetrahedral  
191 volume for collision simulations.
- 192 • Normal maps (.png): each surface model has baked a normal/bump map simulating geomet-  
193 ric textures of the organ.
- 194 • Diffuse maps (.png): each surface model has a baked diffuse map simulating color of the  
195 organ.

196 **Is there a label or target associated with each instance?** If so, please provide a  
197 description.

198 We include the original ground truth labels from the parent datasets for reference. These labels were  
199 generated by clinicians, and are voxel-wise segmentations of different anatomical structures within  
200 the scan.

- 201 • Abdomen-1k: (label=1), kidney (label=2), spleen (label=3), and pancreas (label=4).
- 202 • AMOS: (label=1) spleen, (label=2) right kidney, (label=3) left kidney, (label=4) gallbladder,  
203 (label=5) esophagus, (label=6) liver, (label=7) stomach, (label=8) aorta, (label=9) postcava,  
204 (label=10) pancreas, (label=11) right adrenal gland, (label=12) left adrenal gland, (label=13)  
205 duodenum, (label=14) bladder, (label=16) prostate/uterus
- 206 • TotalSegmentator: the segmentations match the voxel classes of the proposed dataset (see  
207 above).

208 **Is any information missing from individual instances?** If so, please provide a description,  
 209 explaining why this information is missing (e.g., because it was unavailable). This does not  
 210 include intentionally removed information, but might include, e.g., redacted text.

211 The dataset was derived from a variety of CT scans. These were classified as belonging to one of  
 212 the following set: {full-body (FBCT), chest-abdomen-pelvis (CTCAP), abdomen-pelvis (CTAP),  
 213 abdominal (ACT)} (see Table 1). Given that each CT scan images different parts of the human  
 214 anatomy, the presence of each label in the segmentation map will vary. For example, the cervical  
 215 vertebrae (vertebrae C\*) or the brain will not be imaged in an ACT. Therefore, different instances  
 216 will contain different sets of derived assets in the form of .ply, .tet and .png files.

The split of datasets is summarised in Table. 1.

Table 1: Summary of CT data of three datasets from which SARAMIS is derived. FBCT = Full Body CT, CTCAP = chest-abdomen-pelvis CT, CTAP = abdomen-pelvis CT, ACT = Abdomen CT. Other refers to a alternative CT scans, as described in the datasheet for [30].

| Dataset          | Initial | Type of CT Scan |       |      |     |       | Excluded | No changes |
|------------------|---------|-----------------|-------|------|-----|-------|----------|------------|
|                  |         | FBCT            | CTCAP | CTAP | ACT | Other |          |            |
| Abdomen-1k       | 1063    | 10              | 366   | 71   | 592 | 0     | 15       | 526        |
| Amos             | 600     | 0               | 72    | 220  | 0   | 0     | 321      | 140        |
| TotalSegmentator | 1200    | 169             | 197   | 110  | 0   | 724   | 0        | 1200       |
| SARAMIS          | 2863    | 179             | 635   | 401  | 592 | 724   | 336      | 1866       |

217

218 **Are relationships between individual instances made explicit (e.g., users' movie**  
 219 **ratings, social network links)?** If so, please describe how these relationships are made  
 220 explicit.

221 Yes. We maintain the original population splits as defined by their parent datasets.

222 **Are there recommended data splits (e.g., training, development/validation, testing)?** If  
 223 so, please provide a description of these splits, explaining the rationale behind them.

224 No.

225 **Are there any errors, sources of noise, or redundancies in the dataset?** If so, please  
 226 provide a description.

227 Elements of the dataset were generated procedurally:

- 228 1. Baked diffuse reflectance maps and normal maps: using Blender's CYCLES ray-tracing  
 229 engine, the properties of the shader nodes were baked into 2D images for ease of rendering  
 230 in other platforms. The ray-tracing platform involves probabilistic sampling.

231 **Is the dataset self-contained, or does it link to or otherwise rely on external resources**  
 232 **(e.g., websites, tweets, other datasets)?** If it links to or relies on external resources, a)  
 233 are there guarantees that they will exist, and remain constant, over time; b) are there official  
 234 archival versions of the complete dataset (i.e., including the external resources as they  
 235 existed at the time the dataset was created); c) are there any restrictions (e.g., licenses,  
 236 fees) associated with any of the external resources that might apply to a future user? Please  
 237 provide descriptions of all external resources and any restrictions associated with them, as  
 238 well as links or other access points, as appropriate.

239 The dataset was derived from the AMOS [12], Abdomen-1k [15] and TotalSegmentator [30] datasets.  
 240 The TotalSegmentator dataset is available on Zenodo, the AMOS dataset is available on Zenodo, and  
 241 the Abdomen-1k dataset is available on Zenodo.

242 **Does the dataset contain data that might be considered confidential (e.g., data that is**  
243 **protected by legal privilege or by doctor-patient confidentiality, data that includes the**  
244 **content of individuals non-public communications)?** If so, please provide a description.

245 No.

246 **Does the dataset contain data that, if viewed directly, might be offensive, insulting,**  
247 **threatening, or might otherwise cause anxiety?** If so, please describe why.

248 No.

249 **Does the dataset relate to people?** If not, you may skip the remaining questions in this  
250 section.

251 Yes.

252 **Does the dataset identify any subpopulations (e.g., by age, gender)?** If so, please  
253 describe how these subpopulations are identified and provide a description of their respective  
254 distributions within the dataset.

255 No.

256 **Is it possible to identify individuals (i.e., one or more natural persons), either directly**  
257 **or indirectly (i.e., in combination with other data) from the dataset?** If so, please  
258 describe how.

259 No.

260 **Does the dataset contain data that might be considered sensitive in any way (e.g., data**  
261 **that reveals racial or ethnic origins, sexual orientations, religious beliefs, political**  
262 **opinions or union memberships, or locations; financial or health data; biometric or**  
263 **genetic data; forms of government identification, such as social security numbers;**  
264 **criminal history)?** If so, please provide a description.

265 No.

266 **Any other comments?**

267 

|                           |
|---------------------------|
| <b>Collection Process</b> |
|---------------------------|

268

269 **How was the data associated with each instance acquired?** Was the data directly  
270 observable (e.g., raw text, movie ratings), reported by subjects (e.g., survey responses), or  
271 indirectly inferred/derived from other data (e.g., part-of-speech tags, model-based guesses  
272 for age or language)? If data was reported by subjects or indirectly inferred/derived from  
273 other data, was the data validated/verified? If so, please describe how.

- 274 1. The initial CT data was collected by compounding existing datasets of CT scans: Ab-  
275 domen1k, AMOS and TotalSegmentator.
- 276 2. The data was preliminarily annotated using an open-source deep learning segmentation  
277 model [30] trained to predict 104 anatomical classes in CT scans. The open source model is  
278 available here. Given that the TotalSegmentator dataset contains the same labels, and was  
279 inspected by a clinical team, we exclude it from the revision process.
- 280 3. All the preliminary annotations derived from the AMOS and Abdomen-1k dataset were  
281 inspected by a team of 7 trained annotators and 4 radiologists.
- 282 4. Initially, all the preliminary annotations were inspected by trained annotators under the  
283 following protocol:

- 284 (a) Annotators were recruited from the host centre, and consist of 7 junior researchers in  
285 medical imaging, with at least 4 years of medical imaging expertise.
- 286 (b) Annotators were instructed to visually inspect the veracity of the preliminary annota-  
287 tions by inspecting the 3D reconstructions of the preliminary annotations in 3DSlicer.  
288 Additionally, they were instructed to review the overlay of the annotations on the  
289 original CT scan slice by slice.
- 290 (c) Annotators were instructed to: 1) Verify class homogeneity within an anatomical  
291 structure, 2) Flag topological errors (e.g., slices missing, holes within an anatomical  
292 structure), 3) Flag under- or over-segmentation, and 4) Flag potential pathology for  
293 each of the scans to be reviewed. Annotators were requested to log the most superior  
294 and inferior vertebral body visible in the scan, as well as the type of CT scan from  
295 the set {full-body (FBCT), chest-abdomen-pelvis (CTCAP), abdomen-pelvis (CTAP),  
296 abdominal (ACT)}.
- 297 (d) Annotators then received a 2h training session on the how to use the annotation  
298 software (3DSlicer), as well as jointly carrying out a reviewing task with the guidance  
299 of a clinician.
- 300 (e) Annotators carried out the reviewing task under the supervision of a clinician, which  
301 could be consulted in cases where the individual annotator could not resolve the  
302 presence or not of an error.
- 303 (f) Annotators were requested to fill in a spreadsheet with any errors as described above.
- 304 5. Subsequent to the initial review phase, cases that were flagged were individually re-inspected.  
305 Under the supervision of a clinician, the segmentation errors were manually corrected.
- 306 6. Post-review and correction, 450 scans were allocated to radiologists for review of segmenta-  
307 tion and correction quality. Review was carried out under the following protocol:
- 308 (a) 4 radiologists were recruited from the host centre partner hospitals.
- 309 (b) Radiologists were instructed to visually inspect the veracity of the corrected annotations,  
310 and note any significant errors (in the form of gross mistakes versus small pixel-wise  
311 deviations in segmentation veracity), as well as any pathology arising from the scan.
- 312 (c) Radiologists received a brief training on using the segmentation platform 3DSlicer, and  
313 were requested to fill in a spreadsheet with errors noted in the scans.
- 314 7. Once the review phase was concluded, the data was post-processed to obtain, firstly, the 3D  
315 meshes this consisted of the following steps:
- 316 (a) Label cleanup: removal of noise in the verified segmentations, consisting of salt-and-  
317 pepper removal.
- 318 (b) Meshing: following the label cleanup, the 3D volumes were converted into .ply files  
319 using the marching cubes algorithm (`vtk.vtkMarchingCubes()`).
- 320 (c) Mesh decimation and smoothing: given the voxel resolution of the original CT scans  
321 could vary between 0.5-5+mm in each direction, the meshes are smoothed using Lapla-  
322 cian smoothing to better represent smooth surfaces. Additionally, a mesh decimation is  
323 performed; specifically, we perform a quadric edge collapse using an implementation  
324 from MeshLab.
- 325 (d) Tetrahedral volume generation: the algorithm detailed in [10] through an open-source  
326 implementation. .msh files are converted into .vtk files using `gmsh`.
- 327 8. The 3D meshes were then processed using Blender to obtain normal maps (to texture the  
328 surfaces) and diffuse maps (to add colour to the surfaces). The normal maps and diffuse  
329 maps were generated procedurally.
- 330 (a) We design procedural textures and Principled Bi-directional Scattering Distribution  
331 Functions (BSDFs) for a number of anatomy groups using Blender’s shading node by  
332 referencing open-source datasets of intra-operative images [3, 29, 1], surgical journal  
333 papers [11, 28, 16], and open-source tutorials [21]. Final procedural materials were  
334 inspected and verified by a clinician.

- 335 • Bones: all vertebrae, all ribs, sacrum, all humerus, all tibia, all hips, all femur
  - 336 • Lungs: Lung segments, trachea
  - 337 • Stomach: stomach, urinary bladder
  - 338 • Pancreas: pancreas, adrenal gland
  - 339 • Bowels: duodenum, colon, small bowel, oesophagus
  - 340 • Gallbladder: gallbladder
  - 341 • Liver: liver, kidneys
  - 342 • Spleen: spleen
  - 343 • Vascular: all veins and arteries
  - 344 • Muscle: gluteus, autochthons, iliopsoas, all heart segments
- 345 (b) A Shader node in Blender was created for each reference texture and diffuse map.
- 346 (c) The associated organ meshes were procedurally unwrapped, and the textures and diffuse
- 347 maps were baked using GPU Cycles in Blender (cycles=1).
- 348 (d) Full shader nodes are provided open-source for the procedural simulation of textures, or
- 349 modification of parameters. We refer the reader to the implementation at the associated
- 350 SARAMIS repository.

351 **What mechanisms or procedures were used to collect the data (e.g., hardware appa-**  
 352  **ratus or sensor, manual human curation, software program, software API)? How were**  
 353  **these mechanisms or procedures validated?**

354 The data was collected through manual human curation of an open source dataset. The annotation  
 355 was performed through the use of an Apple iPad (8th Gen) with an Apple Pencil (1st Gen) with an  
 356 instance of 3DSlicer (5.2.2) mirrored onto the iPad. The meshing was performed using open-source  
 357 tools, such as meshio, VTK, and MeshLab, and using Blender. All post-processing was performed  
 358 on a desktop with an Intel Core i9 24-Core Processor i9-13900KF (3.0GHz) 36MB Cache, 64GB  
 359 of RAM, and an NVIDIA 3090Ti 24GB GPU. The procedural texturing and creation of diffuse  
 360 maps was performed through the use of shader nodes in Blender. The full software stack is released  
 361 open-source with the dataset and associated paper.

362 **If the dataset is a sample from a larger set, what was the sampling strategy (e.g.,**  
 363  **deterministic, probabilistic with specific sampling probabilities)?**

364 Several of the original scans that were used to extract the data-points were excluded. From the initial  
 365 2863 scans, a total of 336 were excluded from segmentation analysis for the following reasons: 194  
 366 due to lack of availability of test set label, 15 due to significant pathology making organ differentiation  
 367 difficult, 13 due to the presence of fluid in the abdomen (e.g. haemoperitoneum or ascites) occluding  
 368 organs of interest, 100 due to alternative imaging modality (MRI), 2 due to metallic artefacts in  
 369 the scan, 1 due to a poor quality scan, and 1 due to original file corruption leading to lack of a  
 370 segmentation file. Overall, this results in 1048, 279, 1200 scans from the Abdomen-1k, AMOS,  
 371 and TotalSegmentator datasets, respectively. We detail the excluded data in the metadata folder  
 372 excluded.txt file.

373 **Who was involved in the data collection process (e.g., students, crowdworkers,**  
 374  **contractors) and how were they compensated (e.g., how much were crowdworkers**  
 375  **paid)?**

376 7 trained annotators (junior medical image researchers with 4+ years of experience in medical  
 377 imaging) and 4 radiologists (specialty training levels 1-4, NHS England).

378 **Over what timeframe was the data collected? Does this timeframe match the creation**  
 379  **timeframe of the data associated with the instances (e.g., recent crawl of old news**  
 380  **articles)? If not, please describe the timeframe in which the data associated with the**  
 381  **instances was created.**

382 The SARAMIS was annotated and processed between Jan-Jun 2023. The original CT scans were  
383 published in 2021 (Abdomen-1k, collected between 2019 and 2021), 2022 (AMOS and TotalSegmen-  
384 tator).

385 **Were any ethical review processes conducted (e.g., by an institutional review board)?**  
386 If so, please provide a description of these review processes, including the outcomes, as  
387 well as a link or other access point to any supporting documentation.

388 No.

389 **Does the dataset relate to people?** If not, you may skip the remaining questions in this  
390 section.

391 Yes.

392 **Did you collect the data from the individuals in question directly, or obtain it via third**  
393 **parties or other sources (e.g., websites)?**

394 The data was collected from open-source medical imaging datasets.

395 **Were the individuals in question notified about the data collection?** If so, please  
396 describe (or show with screenshots or other information) how notice was provided, and  
397 provide a link or other access point to, or otherwise reproduce, the exact language of the  
398 notification itself.

399 The original datasets which were post-processed are provided under either CC-BY-4.0 or a CC-BY-  
400 NC-SA licenses, which allows for the redistribution of the material in any medium or format, as well  
401 as adaptation of the material for any purpose for non-commercial purposes under a similar license.  
402 The original individuals would have consented to such a license, and thus not notified of further  
403 amendments.

404 **Did the individuals in question consent to the collection and use of their data?** If so,  
405 please describe (or show with screenshots or other information) how consent was requested  
406 and provided, and provide a link or other access point to, or otherwise reproduce, the exact  
407 language to which the individuals consented.

408 See above.

409 **If consent was obtained, were the consenting individuals provided with a mechanism**  
410 **to revoke their consent in the future or for certain uses?** If so, please provide a  
411 description, as well as a link or other access point to the mechanism (if appropriate).

412 No further consent beyond that of the original datasets was obtained.

413 **Has an analysis of the potential impact of the dataset and its use on data subjects**  
414 **(e.g., a data protection impact analysis) been conducted?** If so, please provide a  
415 description of this analysis, including the outcomes, as well as a link or other access point  
416 to any supporting documentation.

417 No.

418 **Any other comments?**

419  
420

Preprocessing/cleaning/labeling

421 **Was any preprocessing/cleaning/labeling of the data done (e.g., discretization or**  
422 **bucketing, tokenization, part-of-speech tagging, SIFT feature extraction, removal of**

423 **instances, processing of missing values)?** If so, please provide a description. If not, you  
424 may skip the remainder of the questions in this section.

- 425 • The automatic segmentations were manually corrected under the supervision of a clinician,  
426 and consisted in adding and removing pixels to adjust the segmentations as needed.
- 427 • The corrected segmentations were filtered using binary morphological closing operation  
428 (cross kernel, size=1). Additionally, the intra-patient segmentations were verified against  
429 each other to ensure they did not intersect (as this is not anatomically plausible). Where  
430 intersection was found, the intersection of both classes were set to 0.
- 431 • The extracted surface representations were smoothed using Laplacian smoothing.
- 432 • The smoothed surfaces were decimated using mesh decimation.

433 **Was the “raw” data saved in addition to the preprocessed/cleaned/labeled data (e.g.,**  
434 **to support unanticipated future uses)?** If so, please provide a link or other access point  
435 to the “raw” data.

436 Yes - the original CT data, as well as the pre-corrected segmentations and post-corrected segmenta-  
437 tions are saved and provided.

438 **Is the software used to preprocess/clean/label the instances available?** If so, please  
439 provide a link or other access point.

440 Yes - see the associated SARAMIS repository.

441 **Any other comments?**

442

443 

|             |
|-------------|
| <b>Uses</b> |
|-------------|

444

445 **Has the dataset been used for any tasks already?** If so, please provide a description.

446 Beyond the usage in the paper associated to the dataset, the data has not been used for other tasks.

447 **Is there a repository that links to any or all papers or systems that use the dataset?** If  
448 so, please provide a link or other access point.

449 N/A

450 **What (other) tasks could the dataset be used for?**

451 The uses for this dataset are multiple.

- 452 • Synthetic data generation: the 3D models can be paired with a rendering environment to  
453 obtain 2D RGB images, 2D depth maps, 2D segmentation maps, and 2D optical flow images.
- 454 • Deformation simulation: the tetrahedral volumes provided can be used for the simulation of  
455 deformation of organs in a surgical setting.
- 456 • Generative 3D models: The 3D models could be used to create a 3D generative model of  
457 given organs.
- 458 • Learning textures in surgery: the 3D models could be paired with real intra-operative video  
459 (2D RGB images) to learn how to texture different organs in the human body.
- 460 • Camera-pose estimation: pose labels may be generated from a rendering environment, paired  
461 with a 2D image, to learn how to perform camera pose-estimation on different organs in  
462 surgery.



463 • Navigation: Like the exemplified case in the paper for this dataset, different organs could be  
464 used to design surgical scenes or scenarios, to teach reinforcement learning algorithms how  
465 to navigate to different targets, how to perform certain actions, or how to interact with the  
466 shapes in the environment.

467 **Is there anything about the composition of the dataset or the way it was collected**  
468 **and preprocessed/cleaned/labeled that might impact future uses?** For example, is  
469 there anything that a future user might need to know to avoid uses that could result in unfair  
470 treatment of individuals or groups (e.g., stereotyping, quality of service issues) or other  
471 undesirable harms (e.g., financial harms, legal risks) If so, please provide a description. Is  
472 there anything a future user could do to mitigate these undesirable harms?

473 No.

474 **Are there tasks for which the dataset should not be used?** If so, please provide a  
475 description.

476 Given that this dataset could be used to train autonomous agents for medical purposes, we would  
477 recommend careful validation of any autonomous systems prior to translational research.

478 **Any other comments?**

479 

|                     |
|---------------------|
| <b>Distribution</b> |
|---------------------|

480

481 **Will the dataset be distributed to third parties outside of the entity (e.g., company,**  
482 **institution, organization) on behalf of which the dataset was created?** If so, please  
483 provide a description.

484 Yes. The dataset will be provided by a CC BY-NC-SA to the wider public.

485 **How will the dataset will be distributed (e.g., tarball on website, API, GitHub) Does the**  
486 **dataset have a digital object identifier (DOI)?**

487 The full dataset will be released to the public further to review at a minted DOI within the UCL  
488 Research Data Repository.

489 **When will the dataset be distributed?**

490 The dataset is made publically available at the SARAMIS repository, with source code and links to  
491 download the data: <https://github.com/NMontanaBrown/saramis>.

492 **Will the dataset be distributed under a copyright or other intellectual property (IP)**  
493 **license, and/or under applicable terms of use (ToU)?** If so, please describe this license  
494 and/or ToU, and provide a link or other access point to, or otherwise reproduce, any relevant  
495 licensing terms or ToU, as well as any fees associated with these restrictions.

496 The dataset is provided under a CC BY-NC-SA license. The dataset may be shared, re-used and  
497 re-mixed for any purpose, subject to the condition that the original dataset is credited. The dataset  
498 is provided "as-is" and "as-available", and makes no representations or warranties of any kind  
499 concerning the dataset, whether express, implied, statutory, or other. This includes, without limitation,  
500 warranties of title, merchantability, fitness for a particular purpose, non-infringement, absence of  
501 latent or other defects, accuracy, or the presence or absence of errors, whether or not known or  
502 discoverable. The dataset cannot be used for commercial purposes. The dataset or any adaptations  
503 and derivations must be licensed under a similar license.

504 **Have any third parties imposed IP-based or other restrictions on the data associated**  
505 **with the instances?** If so, please describe these restrictions, and provide a link or other



506 access point to, or otherwise reproduce, any relevant licensing terms, as well as any fees  
507 associated with these restrictions.

508 The original datasets used to generate the SARAMIS dataset were provided by:

- 509 1. Abdomen1k: CC BY 4.0 license
- 510 2. AMOS: CC BY NC SA license
- 511 3. TotalSegmentator: CC BY 4.0 license.

512 As we derive from the AMOS dataset, we license the dataset entirely on a CC BY NC SA license.

513 **Do any export controls or other regulatory restrictions apply to the dataset or to**  
514 **individual instances?** If so, please describe these restrictions, and provide a link or other  
515 access point to, or otherwise reproduce, any supporting documentation.

516 No.

517 **Any other comments?**

518

|                    |
|--------------------|
| <b>Maintenance</b> |
|--------------------|

519  
520

521 **Who will be supporting/hosting/maintaining the dataset?**

522 The dataset will be hosted on UCL's Research Data Repository, and it's supporting repository at the  
523 associated SARAMIS repository. These will be maintained in part, but not limited to, Nina Montana-  
524 Brown and Matt Clarkson (first author, and principal investigator of the work, correspondingly), both  
525 at University College London, United Kingdom at the time of publication.

526 **How can the owner/curator/manager of the dataset be contacted (e.g., email ad-  
527 dress)?**

528 The curator can be contacted at: [nina.brown.15@ucl.ac.uk](mailto:nina.brown.15@ucl.ac.uk), or alternatively [m.clarkson@ucl.ac.uk](mailto:m.clarkson@ucl.ac.uk).

529 **Is there an erratum?** If so, please provide a link or other access point.

530 Errata will be modified in this section.

531 Errata: N/A

532 **Will the dataset be updated (e.g., to correct labeling errors, add new instances,  
533 delete instances)?** If so, please describe how often, by whom, and how updates will be  
534 communicated to users (e.g., mailing list, GitHub)?

535 Yes. Where errors are encountered, data is deleted, or more data is included into the dataset, the  
536 versioned data will be uploaded to the UCL Research Data Repository, with links to the original data.  
537 Issues may be raised on the original SARAMIS repository, and errata will be appended to the arXiv  
538 version of the paper as well as the datasheet associated to the dataset.

539 **If the dataset relates to people, are there applicable limits on the retention of the data  
540 associated with the instances (e.g., were individuals in question told that their data  
541 would be retained for a fixed period of time and then deleted)?** If so, please describe  
542 these limits and explain how they will be enforced.

543 No.

544 **Will older versions of the dataset continue to be supported/hosted/maintained?** If so,  
545 please describe how. If not, please describe how its obsolescence will be communicated to  
546 users.

547 Yes. The data will remain hosted on the UCL Research Data Repository.

548 **If others want to extend/augment/build on/contribute to the dataset, is there a mech-**  
549 **anism for them to do so?** If so, please provide a description. Will these contributions  
550 be validated/verified? If so, please describe how. If not, why not? Is there a process  
551 for communicating/distributing these contributions to other users? If so, please provide a  
552 description.

553 The dataset is originally released under a CC-BY-NC-SA license, so authors may extend, augment,  
554 or build on SARAMIS for non commercial purposes provided the data is shared under the same/similar  
555 license.

556 If external parties wish to contribute directly to the dataset, we invite them to raise an issue on the  
557 SARAMIS dataset repository (<https://github.com/NMontanaBrown/saramis>) with their pro-  
558 posed contribution, steps to replicate, as well as a link to the contribution for review by the archivists  
559 of the dataset. The data will be manually reviewed by archivists of the dataset, and may involve  
560 third-parties associated to the archivists for speed of review. This will ensure contributions are  
561 open-source and open to the rest of the public.

562 **Any other comments?**

563

564 **C Procedural Generation of Colon Anatomy**

565 In this section we describe the details for the procedural generation of colon anatomy for the SARAMIS  
 566 dataset.

567 **C.1 Matching Algorithm for Manually Extracted Colon Centerlines**

568 Firstly, we describe the matching algorithm relating to Section 3.1 “Mesh Generation” of the paper in  
 569 Algo. 1.

**Data:**  $N$  unordered, line segments  $L = \{l_1, l_2, \dots, l_n\}$ , each  $l_i$  a set of ordered points,  
 $l_i = \{p_1, p_2, \dots, p_m\}$   $p_i \in \mathbb{R}^3$  of variable length, and start coordinate  $P \in \mathbb{R}^3$ .

**Result:**  $N$  ordered line segments  $L_o$

start  $\leftarrow$  P ;

$L_o \leftarrow []$  ;

**while**  $len(L)$  **do**

    startPoints = [l[0] for l in L];

    endPoints = [l[-1] for l in L];

    closestStart = min(EuclideanDistance(start, startPoints)) ;

    closestEnd = min(EuclideanDistance(start, endPoints)) ;

**if**  $closestStart > closestEnd$  **then**

$l_{next} \leftarrow L[\text{endPoints.index(next)}]$

$\triangleright$  Corresponding segment match

$l_{next} \leftarrow \text{reverse}(l_{next})$

**end**

**else**

$l_{next} \leftarrow L[\text{startPoints.index(next)}]$

**end**

$L_o.\text{insert}(l_{next})$  ;

    start  $\leftarrow l_{next}[-1]$  ;

$L.\text{pop}(l_{next})$  ;

**end**

**Algorithm 1:** Pseudocode to order sets of line segments to create a discontinuous, ordered line segment

570 **C.2 Procedural Generation of Colon Meshes**

571 Having obtained the ordered line segments in  $L_o$ , the curve is filtered for duplicate points, then  
 572 filtered for points where the difference between subsequent points are larger than 2 times the median  
 573 of points filtered using a 1D Gaussian (SD=5). Filtered points were subsequently used to fit a BSpline,  
 574 and resampled to 1000 points.

575 The resampled BSpline curve can be used as the centerline to extrude a closed mesh using Blender.  
 576 Three different functions - implemented via Blender Geometry Nodes - are provided to vary the  
 577 curve radius parameters in the generated mesh in order to replicate anatomical features in real  
 578 colon's: colonic folds and Haustra. The radius  $r \in \mathbb{R}$  at each point  $p \in \mathbb{R}^3$  on the centerline is  
 579 generally parametrised by a function  $r(p, \cdot)$ . We implement three functions as follows, a jitter radius  
 580 function,  $r_{jitter}(p, \cdot)$ , parametrised by the values scale, detail, roughness, distortion, and a multiplier  
 581  $\mathcal{J} = (s, d, r, m, l) \in \mathbb{R}$  respectively, such that:

$$r_{jitter}(p, \mathcal{J}) = l \cdot f_{perlin}(s, d, r, m, \bar{p}) \tag{1}$$

582 where  $f_{perlin}(\cdot)$  evaluates the Perlin noise at the point  $\bar{p}$  with given parameters in  $\mathcal{J}$ . This function  
 583 was created to replicate smaller, internal colonic folds in the colon. The effects of different parameters  
 584 are illustrated in Fig. 2. We further define a function  $r_{sin}(p, \mathcal{S})$ , with arguments  $\mathcal{S} = (b, k, h) \in \mathbb{R}$ ,  
 585 representing base radius  $b$ , amplitude  $k$  and frequency  $h$ , such that:

$$r_{sin}(p, \mathcal{S}) = b \cdot (1 + k \cdot (0.5 \cdot \sin(\bar{p} \cdot h) + 0.5)) \tag{2}$$

586 This function aims to replicate the Haustra in the colon, which vary periodically along the length of  
 587 the colon. The effects of different parameters are illustrated in Fig. 1.

588 Finally, we combine  $r_{jitter}$  and  $r_{sin}$  to in the function  $r_{sin,jitter}$ :

$$r_{sin,jitter}(p, \mathcal{S}, \mathcal{J}) = r_{sin}(p, \mathcal{S}) + r_{jitter}(p, \mathcal{J}) \tag{3}$$

589 to combine both effects into one mesh. These are illustrated in Fig. 3.

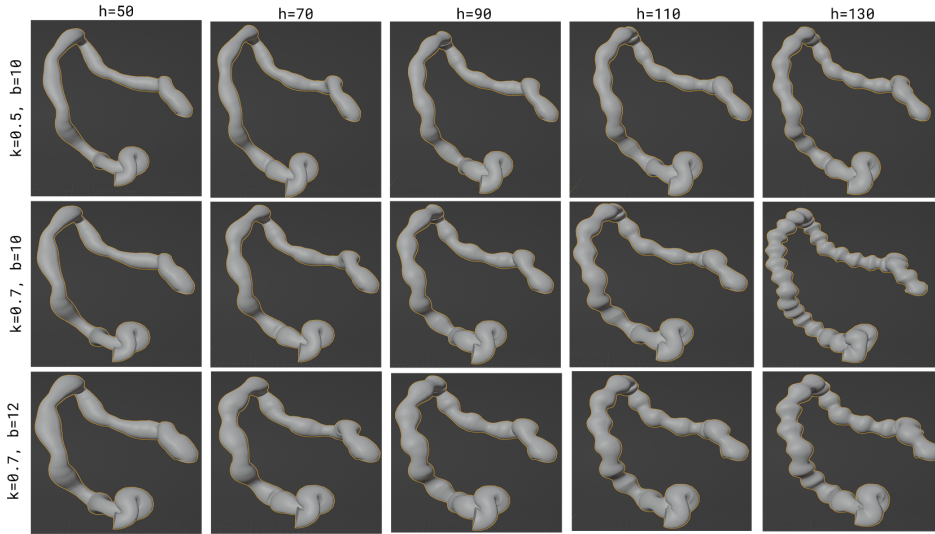

Figure 1: Example renders of procedurally generated colons with different parameters for sinusoidal radius defined in Eqn. 2. Along the columns, the frequency parameter varies between 50-130Hz, and along the rows, we showcase different combinations of amplitude and base radius parameters. In these renders, the curve was re-sampled to 500 points.

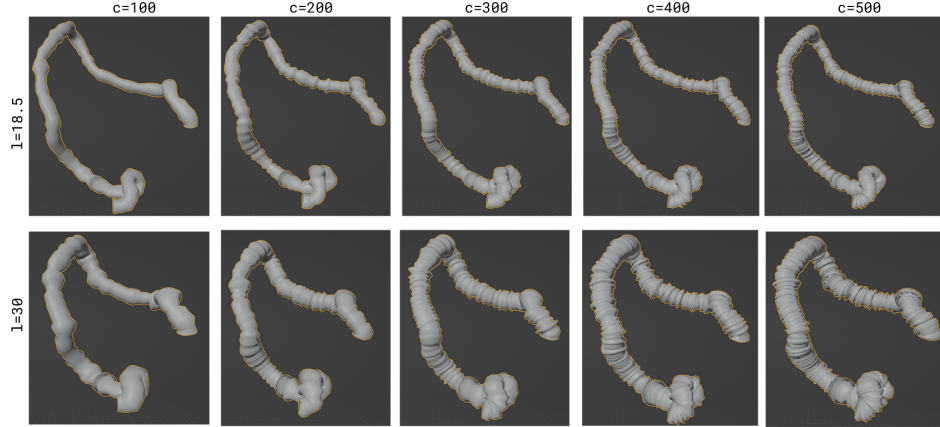

Figure 2: Example renders of procedurally generated colons with different parameters for the jitter radius defined in Eqn. 1. Along the columns, the number of points on the curve is resampled between 100-500 points, and along the rows, we vary the multiplier  $l$  of the radius. We fix the other parameters at: scale=6.2, detail=15.5, roughness=0, distortion=12.1

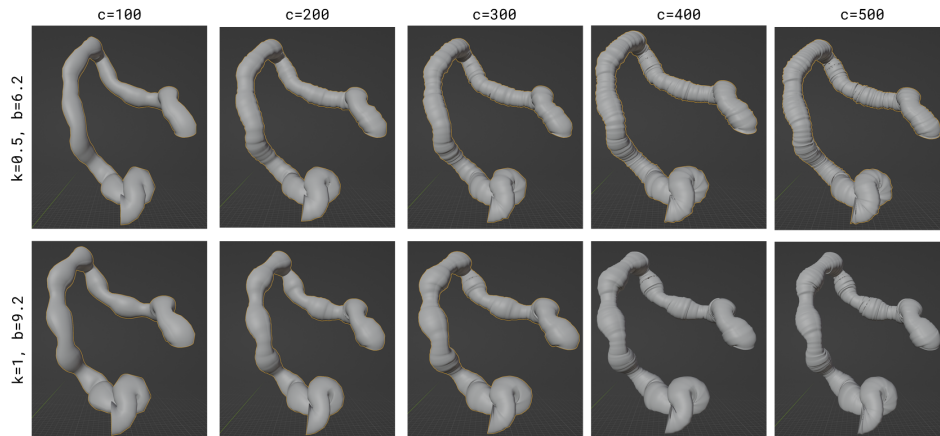

Figure 3: Example renders of procedurally generated colons with different parameters for the combined radius defined in Eqn. 3. Along the columns, the number of points on the curve is resampled between 100-500 points. Along the rows, we showcase different combinations of multiplication values ( $k$ ) and base radius parameters ( $b$ ). We fix the other parameters at: scale=6.2, detail=15.5, roughness=0, distortion=12.1

590 Blender files for the procedural simulation of meshes defined by input centerlines are provided  
 591 open-source in the associated SARAMIS repository.

### 592 C.3 Parameters Describing Autonomous Navigation Dataset

593 For the experiments performed with SARAMIS centerlines, colon meshes were extruded with  $r_{jitter}$   
 594 in Eqn. 1,  $\mathcal{J} = (\text{scale} = 6.2, \text{detail} = 15.5, \text{smoothness} = 0, \text{distortion} = 12.1, l = 12.0)$  with  
 595 curves resampled to 1000 points.

## 596 D Procedural Texturing of Meshes

597 We design procedural textures and principled bi-directional scattering distribution functions (BSDFs)  
 598 for a number of anatomy groups using Blender’s shading node implementation.

### 599 D.1 Introduction to Blender Shader Nodes

600 We illustrate a few examples of how procedural texturing nodes using Blender can generate different  
 601 textures. Consider the function  $f_{perlin}(\cdot, v) : \mathbb{R}^n \rightarrow \mathbb{R}$ , which evaluates the fractal Perlin noise with  
 602 parameters  $\mathcal{P} = (s, d, r, m) \in \mathbb{R}$ , representing scale, detail, roughness, and distortion, respectively  
 603 for a given coordinate N-D coordinate,  $v \in \mathbb{R}^n$ , where  $ns \in \{1, 2, 3, 4\}$ . A simple Blender graph can  
 604 be constructed such that each texture coordinate  $t \in \mathbb{R}^2$  of a given object can be mapped to certain  
 605 parameters of the principal BSDF. The construction of the above Blender graph, and resulting renders  
 606 for different Perlin noise parameters used to modify the base color of the material output is illustrated  
 607 in Fig.4

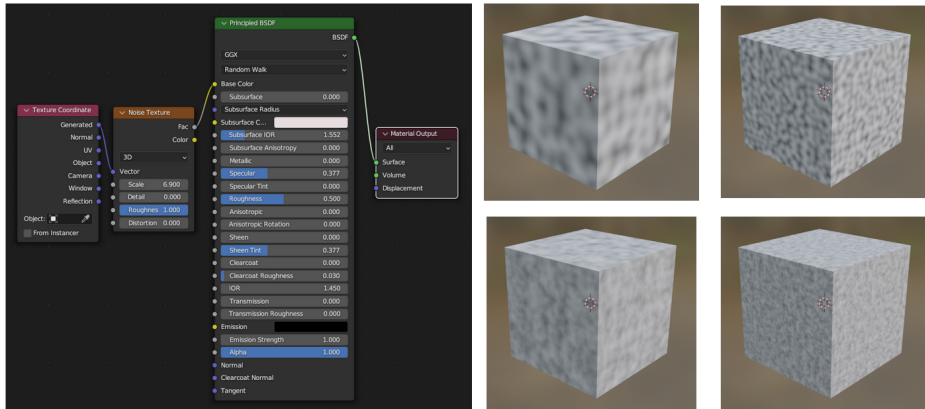

Figure 4: Example renders of procedurally generated textures using Perlin noise to calculate an object’s base color. Row cubes are generated with  $d = [0, 1.5]$ , columns are generated with  $scale = [6.9, 17]$ . Roughness and distortion are kept at 1, 0 respectively.

608 We can expand the above set of shader nodes by adding a color ramp node that modifies the output  
 609  $p = f_{perlin}(\mathcal{P}, v)$  linearly with the following equation values  $c_{max}, c_{min} \in \mathbb{R}$ , and clamping it  
 610 around the equation values:

$$y_{lin} = \frac{p}{c_{max} - c_{min}} + \frac{c_{min}}{c_{min} - c_{max}} \quad (4)$$

$$y_{ramp}(x) = \begin{cases} 0 & \text{if } y(x) < 0 \\ y(x) & \text{if } 0 \leq y_{lin}(p) \leq 1 \\ 1 & \text{if } y(x) > 1 \end{cases} \quad (5)$$

611 We demonstrate the use of color-ramp to modify the base color of a cube in Fig. 5.

612 Additionally, the same original set of nodes may be used to modify other properties in the principal  
 613 BSDF. In Fig. 6 we showcase using the metallic, roughness and clearcoat properties of the BSDF to  
 614 modify the clamped Perlin texture on the render. These do not directly affect the base color of the  
 615 object (which is set to black), but rather the way that light interacts with the material.

616 The same functions can be used to generate different normal mappings on the texture coordinates,  
 617 therefore modifying the texture appearance of the object without modifying the underlying geometry.  
 618 In Fig. 7, we showcase how to use a Blender displacement node in order to modify the material  
 619 displacement procedurally.

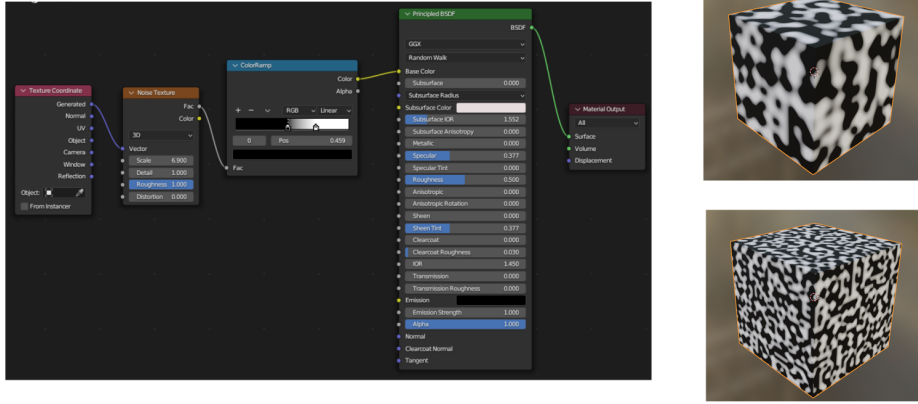

Figure 5: Example renders of procedurally generated textures using Perlin noise and a color ramp node to calculate an object's base color. Cubes are generated scale = [6.9, 17]. Roughness, distortion and detail are kept at 1, 0, and 0, respectively.

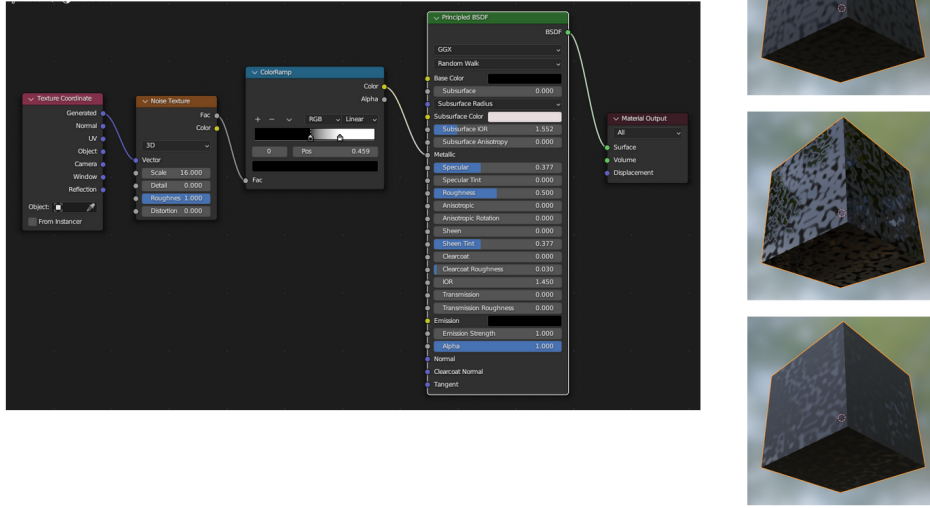

Figure 6: Example renders of procedurally generated textures using Perlin noise and a color ramp node to calculate an object's different properties, with the same base color. Top, middle, and bottom renders are generated using the metallic, roughness, and clearcoat parameters, respectively. Cubes are generated scale = [6.9, 17]. Roughness, distortion and detail are kept at 1, 0, and 0, respectively.

620 Furthermore, combinations of functions may be used in order to generate more complex textures.  
 621 For example, we may generate a novel texture with two different  $\mathcal{P}$ , and multiplying their output.  
 622 Let  $\mathcal{P}_1 = [0.6, 1.8, 1.0, 2.6]$  and  $\mathcal{P}_2 = [2.8, 1.8, 1.0, 2.2]$ . The material normal displacement  
 623 is defined by the function  $t_{displacement}(\cdot, v) : \mathbb{R}^2 \rightarrow \mathbb{R}$ :

$$t_{displacement}(\mathcal{P}_1, \mathcal{P}_2, v) = f_{perlin}(\mathcal{P}_1, v) \times f_{perlin}(\mathcal{P}_2, v) \quad (6)$$

624 and is described in Fig.8.



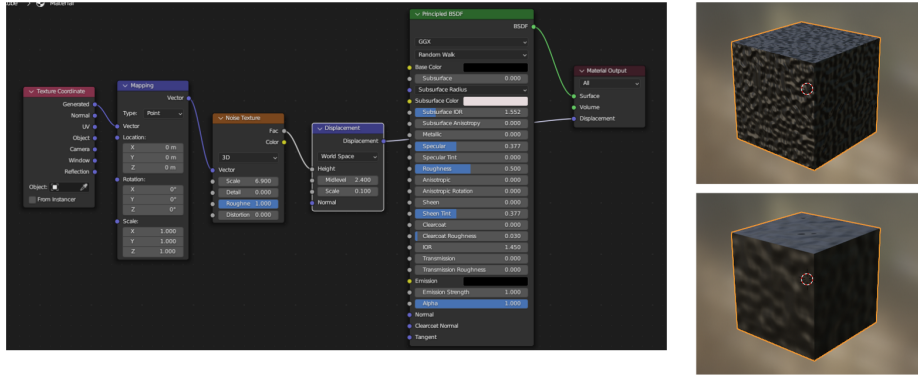

Figure 7: Example renders of procedurally generated textures using Perlin noise and a displacement node, with the same base color. Cubes are generated scale = [6.9, 17]. Roughness, distortion and detail are kept at 1, 0, and 0, respectively, as well as displacement parameters [midlevel=2.4, displacement=0.2].

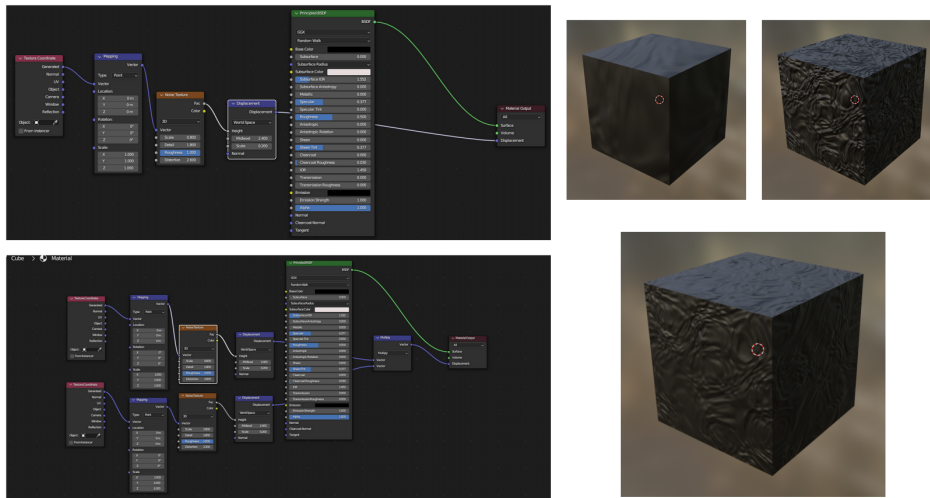

Figure 8: Example renders of procedurally generated textures using combination of Perlin noise, displacement node and vector math nodes, with the same base color. The textures are generated with  $\mathcal{P}_1 = [0.6, 1.8, 1.0, 2.6]$  and  $\mathcal{P}_2 = [2.8, 1.8, 1.0, 2.2]$ , respectively. We showcase the individual Blender shader nodes on the left, with the top panel representing the individual configuration, and the combined configuration on the bottom. The three renders represent the different parametrisations, with the bottom representing the combined parametrisation.

## 625 D.2 Generation of SARAMIS Textures

626 We use the basic principles described in Sec. D.1 to iteratively create textures to describe the  
 627 appearance of different organs and organ groups in the human body. To replicate the materials,  
 628 we reference open-source datasets of intra-operative images [3, 29, 1], surgical journal papers  
 629 [11, 28, 16], and open-source tutorials [21]. The materials were generated under the supervision of a  
 630 clinician with surgical experience, and final procedural materials were inspected and verified by a  
 631 clinician.

632 Due to the complexity of the generated textures, we provide screenshots of each of the reported  
 633 textures, as well as example renders resulting from the Blender shader nodes. We additionally point  
 634 the readers to the open-source implementation of the full shading graph that is provided for each  
 635 texture in the SARAMIS repository: <https://github.com/NMontanaBrown/saramis>.



636 **D.2.1 Bowels**

637 We consider the stomach, oesophagus, small bowel, duodenum, and the colon as the bowels. We  
638 texture the small bowel, duodenum, oesophagus and colon with the same texture, whilst maintaining  
639 a different texture for the stomach.

640 Summary of Blender shading node for the stomach is displayed in Fig.9. Due to the complexity of  
641 this graph, we refer the reader to the implementation provided in Blender in the SARAMIS for full  
642 detail.

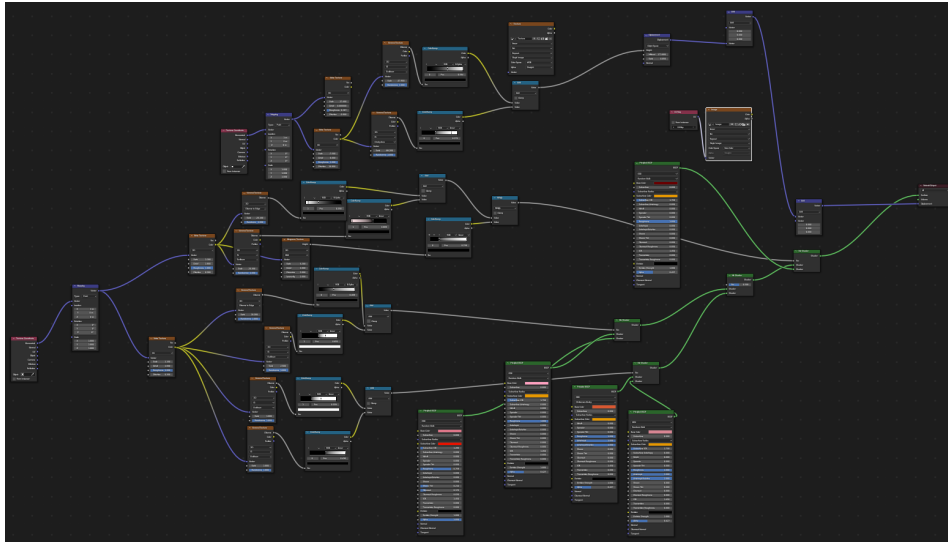

Figure 9: Summary of Blender shading graph generated with stomach material

643 We showcase renders of the stomach in Fig. 11.

644 Summary of Blender shading node for the colon and bowels is displayed in Fig.10. Due to the  
645 complexity of this graph, we refer the reader to the implementation provided in Blender in the  
646 SARAMIS for full detail.

647 We showcase renders of the colon in Fig. 12.

648 **D.2.2 Liver, Pancreas, Gallbladder, Spleen, Kidneys, Adrenal Glands**

649 The liver, pancreas, gallbladder and spleen have a reference textures derived from the Dresden  
650 Anatomy Dataset [3] and the Cholec80k dataset [29]. The adrenal glands were textured using the  
651 pancreas texture, due to similarity of found reference image of healthy adrenal glands[16] to the  
652 pancreas reference images. The kidneys were textured using the liver texture, again due to similarity  
653 between liver and kidney textures.

654 The liver shader graph is split across two figures (Fig.13 - 14),

655 The gallbladder shader graph is split across two figures (Fig.15 - 16).

656 We showcase example renders of the liver and gallbladder in Fig. 21.

657 The pancreas shader graph is described in Figs.17 - 18.

658 We showcase example renders of the pancreas in Fig. 23.

659 The pancreas shader graph is described in Figs.19 - 20.

660 We showcase example renders of the spleen in Fig. 22.

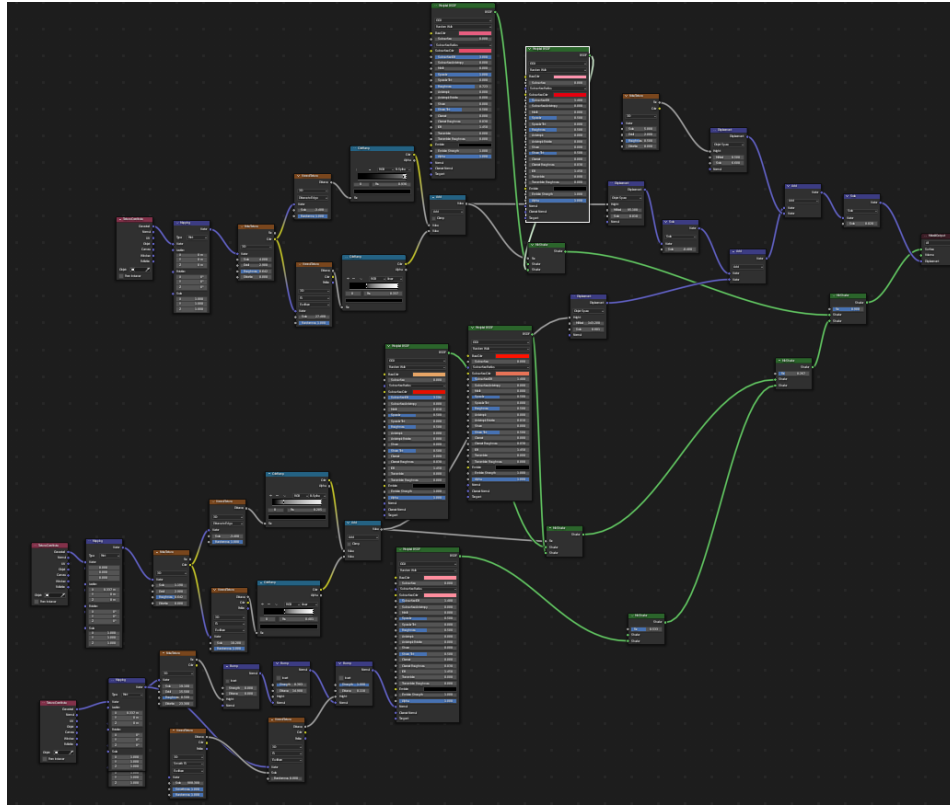

Figure 10: Summary of Blender shading graph generated with colon material

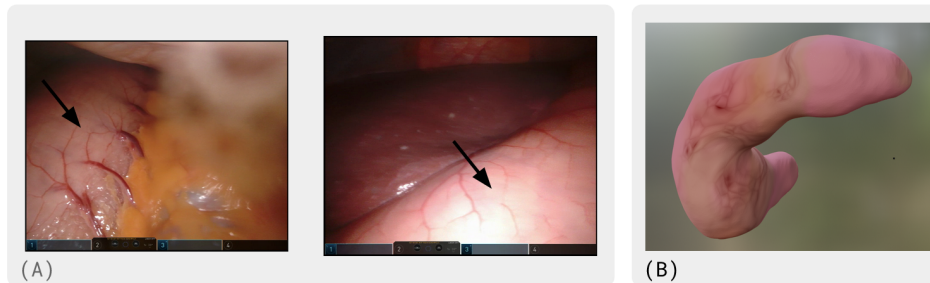

Figure 11: Reference images for stomach, alongside Blender renders of procedural texturing and shading of a stomach. Panel A) shows reference images from the Dresden Surgical Dataset [3] used to generate the procedural nodes, panel B) showcases a Blender render of the procedural textures on a SARAMIS stomach.

661 **D.2.3 Lungs, Bone, and Muscle**

662 The lungs, bone and muscle were textured by referencing a surgical journal [11], an open source  
 663 tutorial [21], and a surgical journal respectively [28]; we showcase renders in Fig. 24. Bone shader  
 664 graph is included in Fig. 25 and muscle shader graph is included in Fig. 26. Due to complexity, the  
 665 lung shader graph is split across three figures (Figs. 27 - 29).

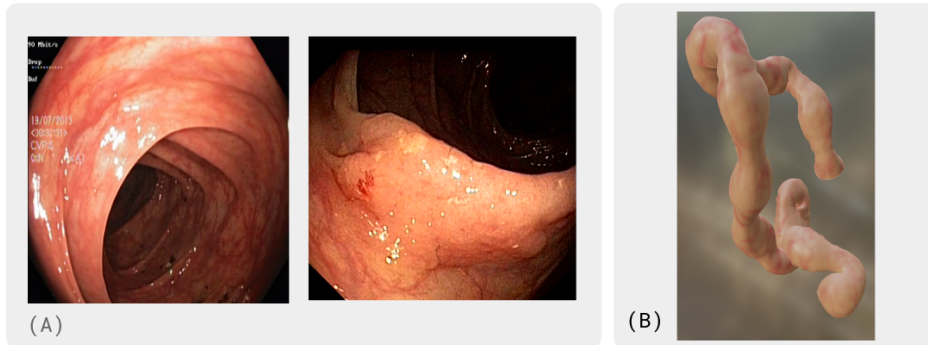

Figure 12: Reference images for the colon, alongside Blender renders of procedural texturing and shading of a colon. Panel A) shows reference images from the HyperKvasir dataset [1] used to generate the procedural nodes, panel B) showcases a Blender render of the procedural textures on a SARAMIS procedurally generated colon.

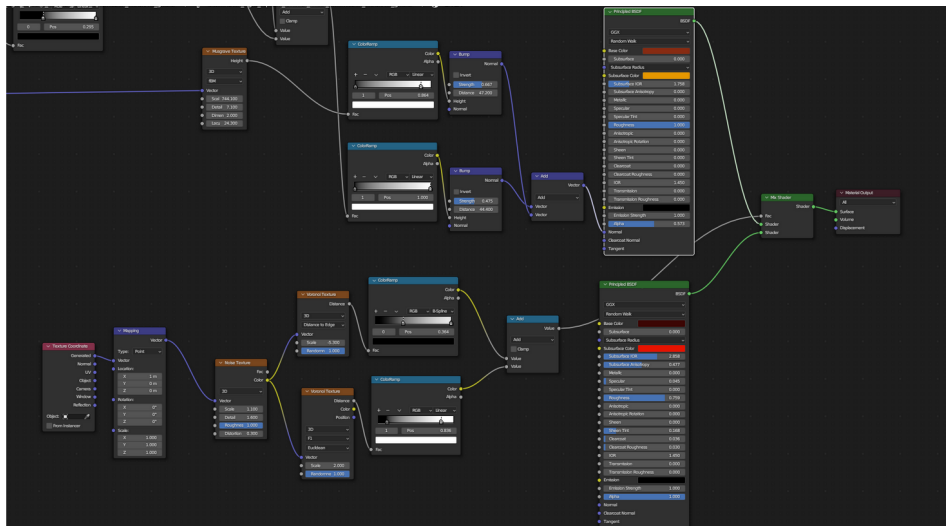

Figure 13: 1st half of Blender shading graph generated with liver material, outlining mainly the color mapping.

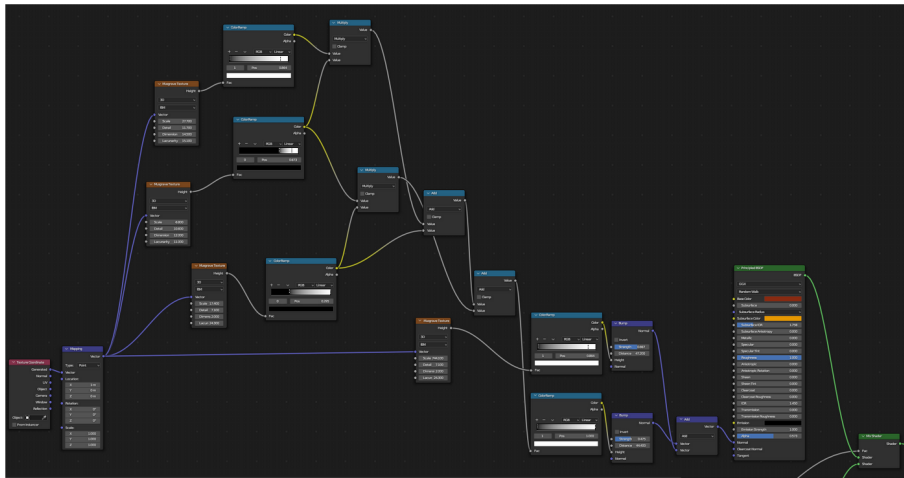

Figure 14: 2nd half of Blender shading graph generated with liver material, outlining mainly the bump map generation of the BSDF.

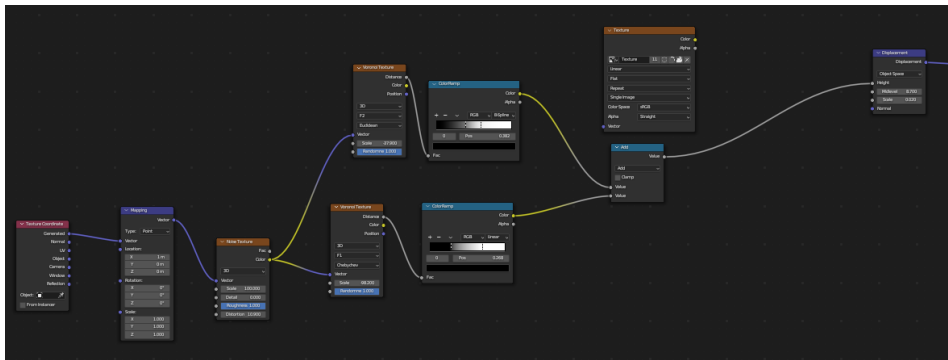

Figure 15: 1st half of Blender shading graph generated with gallbladder material, outlining mainly the color mapping.

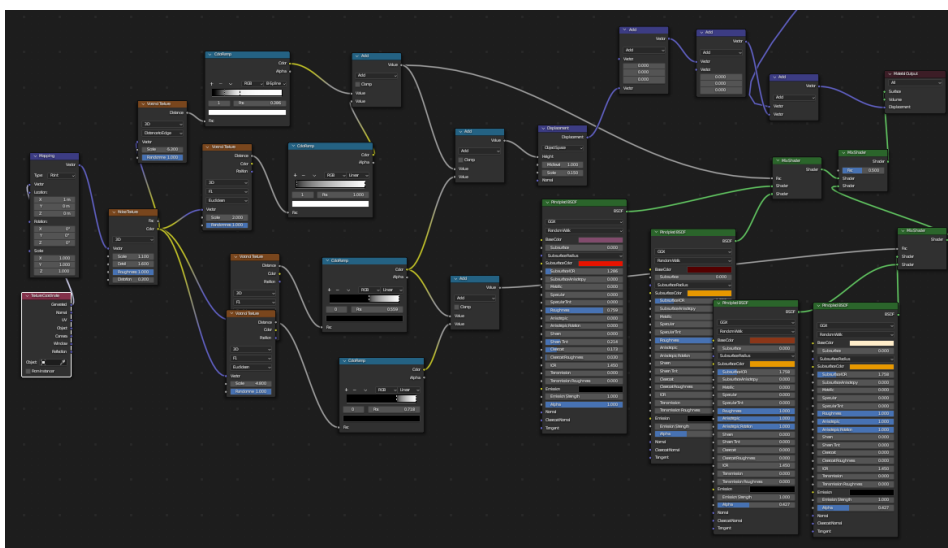

Figure 16: 2nd half of Blender shading graph generated with gallbladder material, outlining mainly the bump map generation of the BSDF.

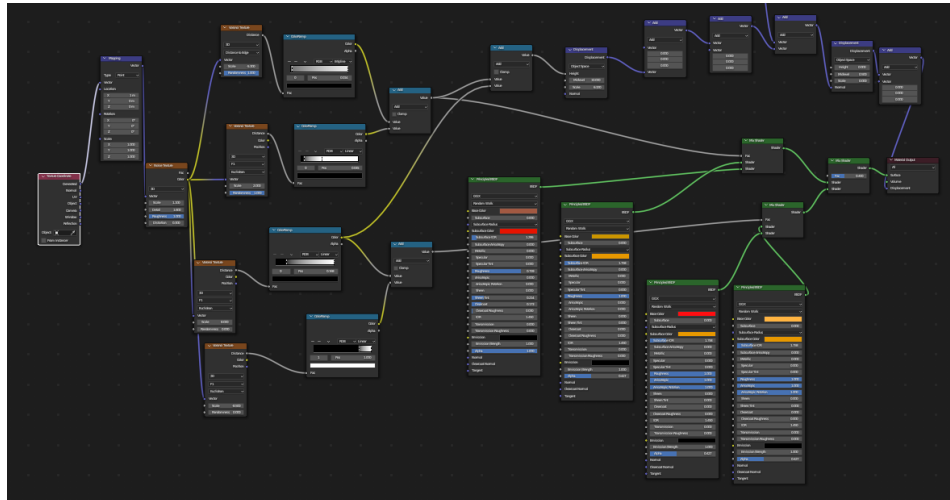

Figure 17: 1st half of Blender shading graph generated with pancreas material, outlining mainly the color mapping.

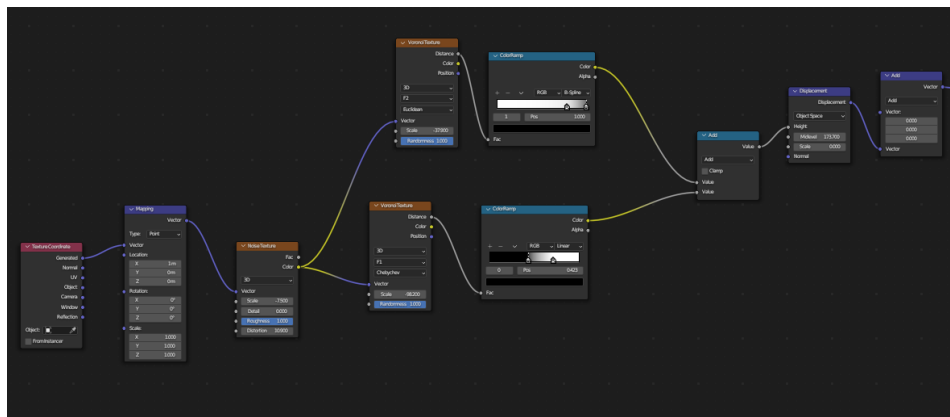

Figure 18: 2nd half of Blender shading graph generated with pancreas material, outlining mainly the bump map generation of the BSDF.

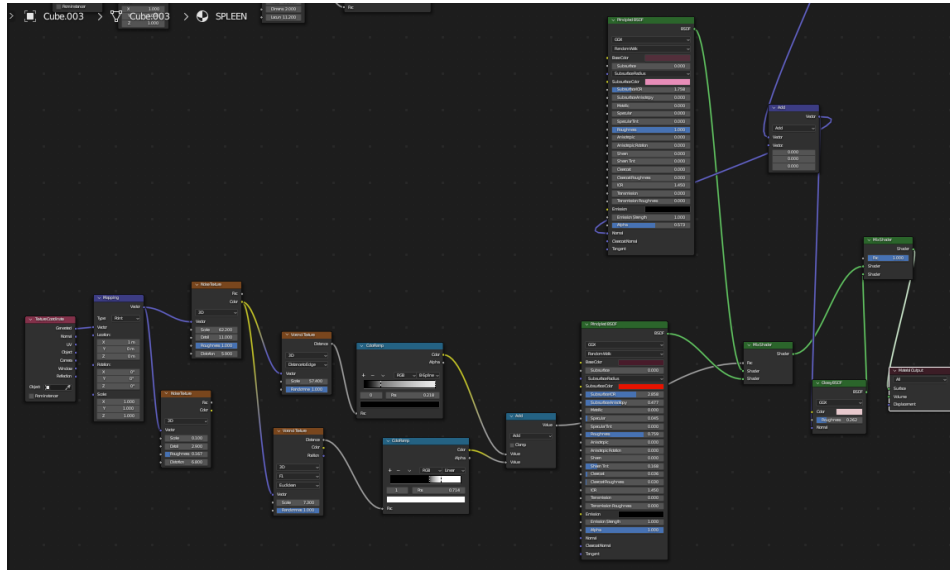

Figure 19: 1st half of Blender shading graph generated with spleen material, outlining mainly the color mapping.

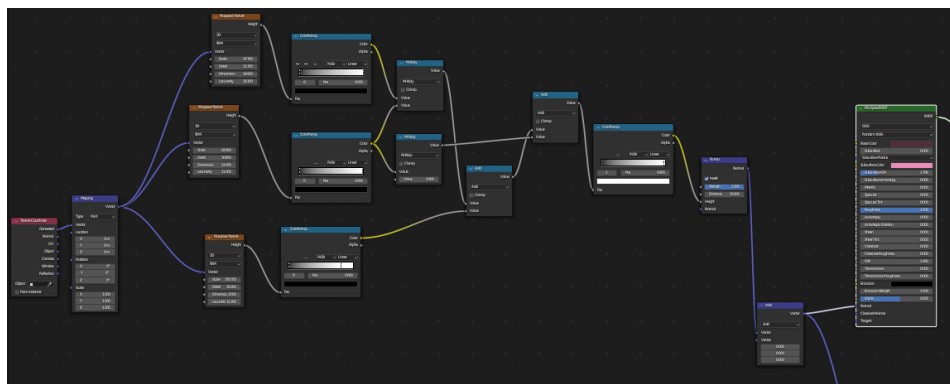

Figure 20: 2nd half of Blender shading graph generated with spleen material, outlining mainly the bump map generation of the BSDF.

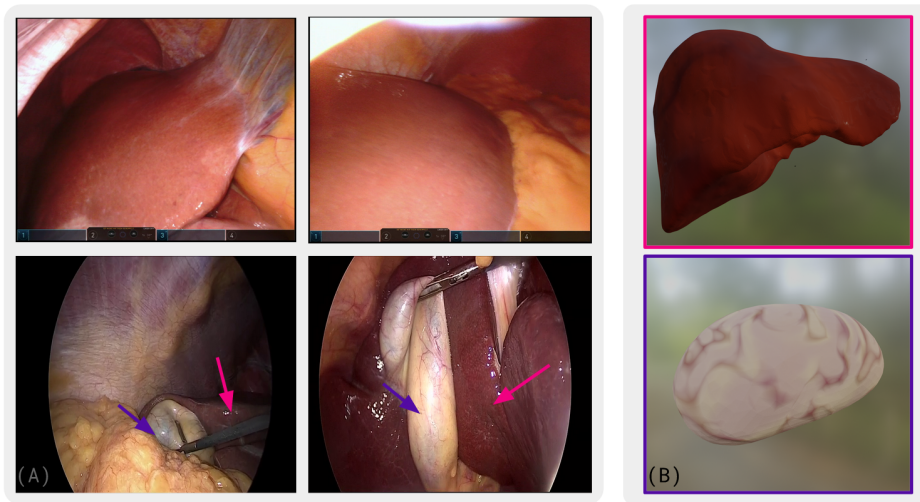

Figure 21: Reference images for liver and gallbladder, alongside Blender renders of procedural texturing and shading of the same structures. Panel A) shows reference images used to generate the procedural nodes (top row: liver, from the Dresden Anatomy dataset [3], bottom row: liver signalled with a pink arrow, gallbladder with a purple arrow, from the Cholec80k [29] dataset). Panel B) showcases Blender renders of the procedural textures, top showing the liver and bottom showing the gallbladder.

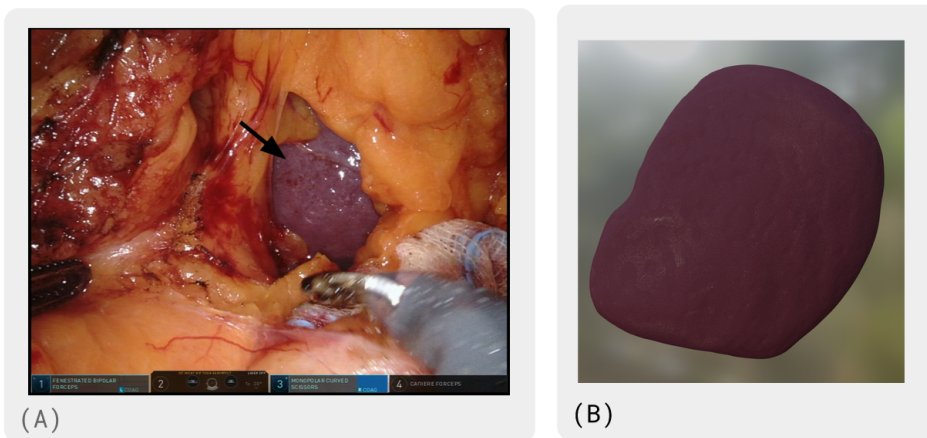

Figure 22: Reference image for the spleen with a Blender render of a SARAMIS spleen. Panel A) shows reference images used to generate the procedural nodes from the Dresden Anatomy dataset [3]. Panel B) showcases Blender renders of the procedural textures on a SARAMIS spleen.



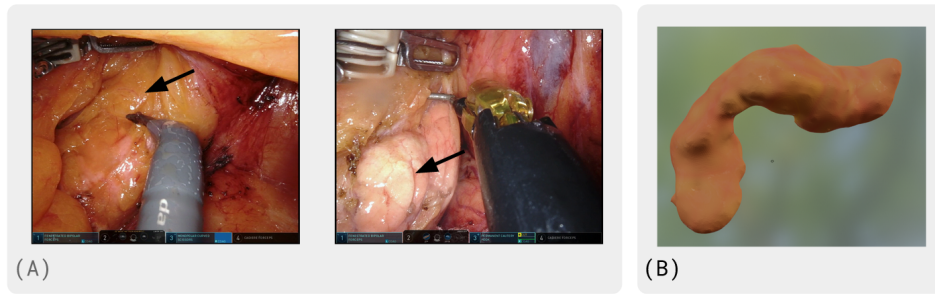

Figure 23: Reference images for pancreas, alongside Blender renders of procedural texturing and shading of a pancreas. Panel A) shows reference images from the Dresden Surgical Dataset [3] used to generate the procedural nodes, panel B) showcases a Blender render of the procedural textures on a SARAMIS pancreas.

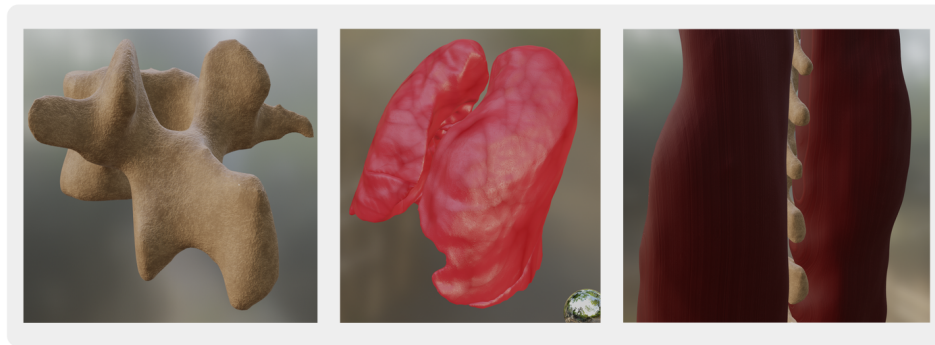

Figure 24: Blender renders for bone (left), lungs (center), and muscle (right). Bone material was generated with reference to [21], lungs with reference to [11], and muscle with reference to [28]

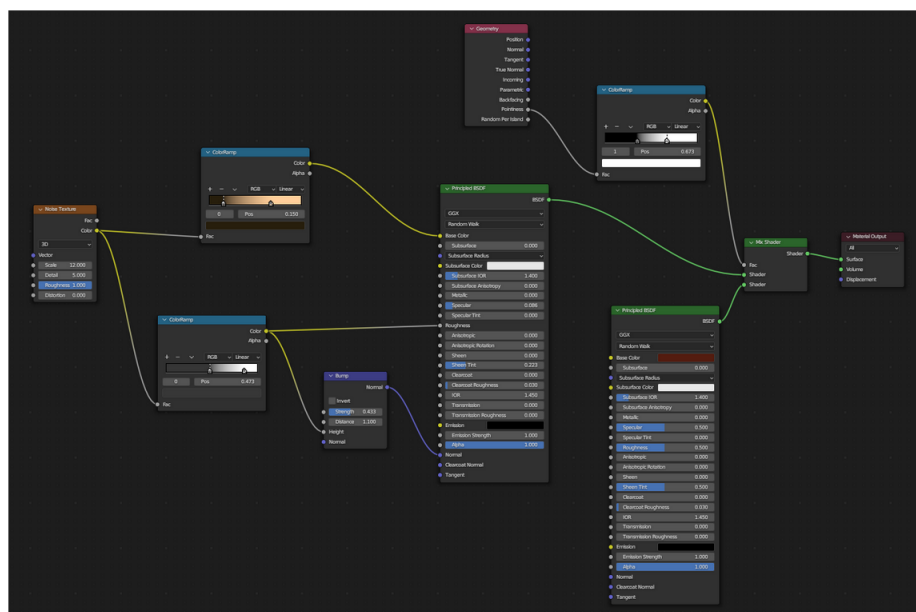

Figure 25: Blender shading graph generated with reference to [21] for bone material



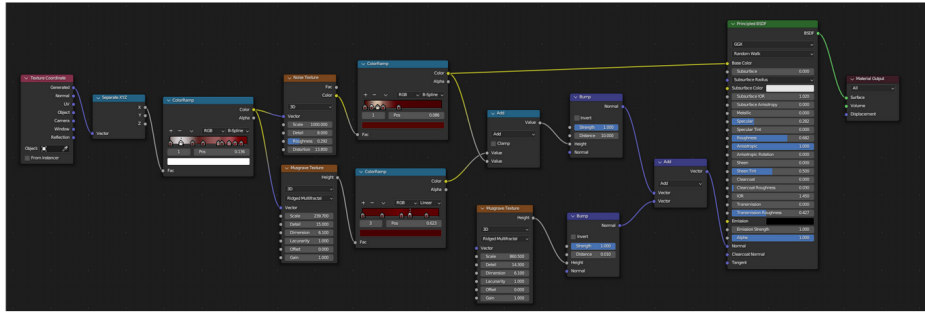

Figure 26: Blender shading graph generated with reference to [28] for muscle material

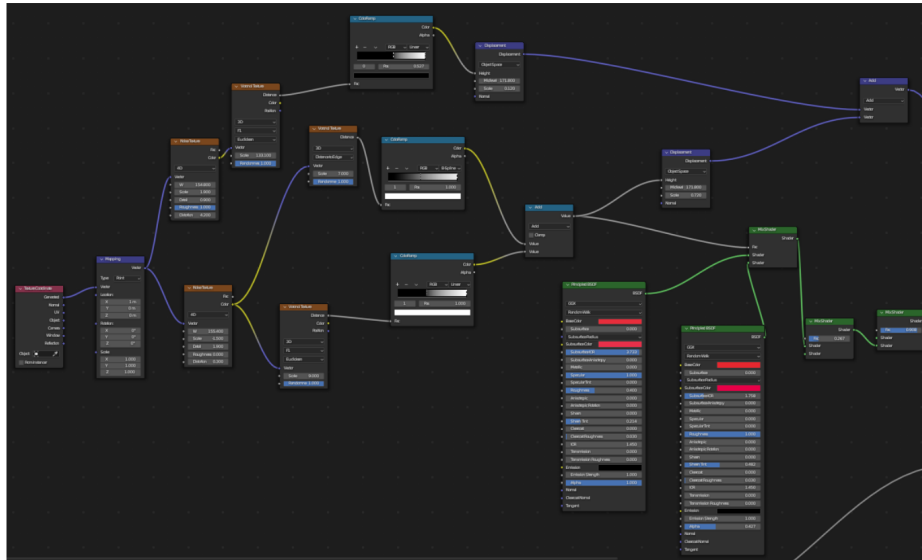

Figure 27: 1st 3rd of Blender shading graph generated with reference to [11] for lung material

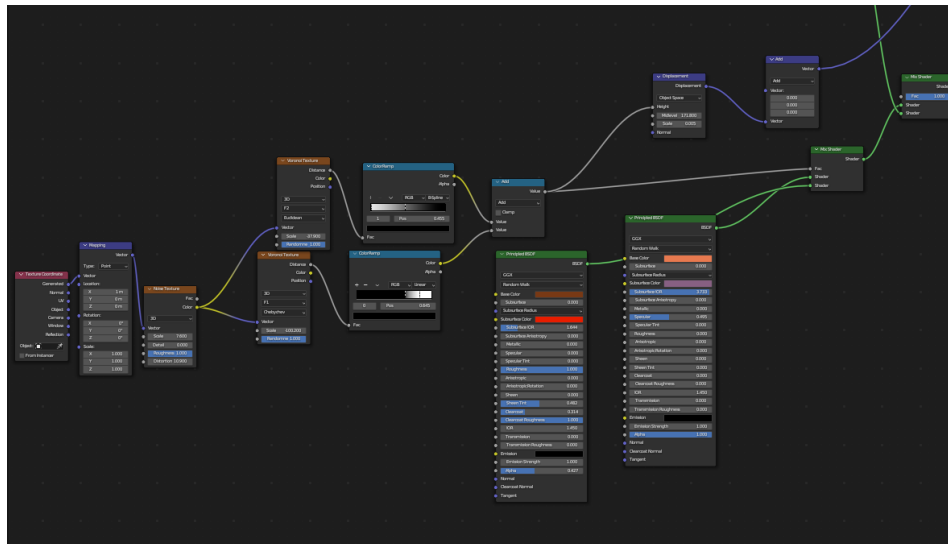

Figure 28: 2nd shading graph generated with reference to [11] for lung material. The output of the mix shader node from Fig.27 (lower furthest right green node) is connected to the mix shader node on the far right of this figure. The output of the vector math node (purple, furthest right node) is connected to an add math node in Fig.29.

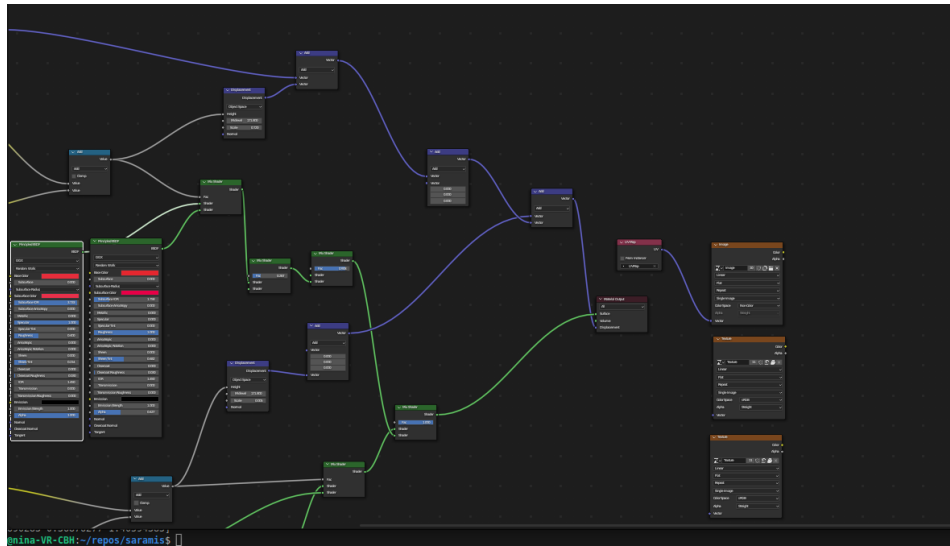

Figure 29: 3rd shading graph generated with reference to [11] for lung material, which combines outputs from the previous two portions of the graph to the final texture output.

## 666 **E Trajectory Comparison Between Human and RL Agent**

667 We compare human and RL performance by plotting five trajectories obtained on test cases of  
668 the TotalSegmentator sub-test set in Fig. 30. To better represent the colonoscopy case, we set the  
669 navigation target to the caecum and initialise navigation from the rectum (highlighted in blue and  
670 green bounding boxes, respectively). Human trajectories are qualitatively found to be smoother than  
671 RL trajectories.

Trajectory comparison between Human and RL for TotalSegmentator s1379 case

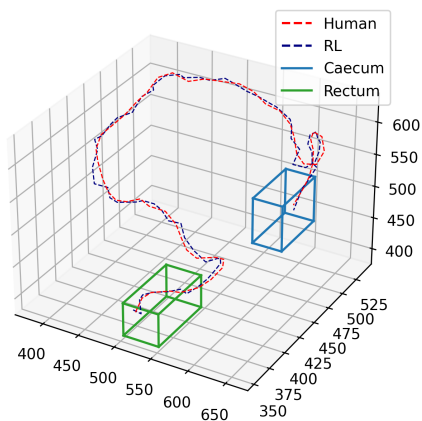

Trajectory comparison between Human and RL for TotalSegmentator s1383 case

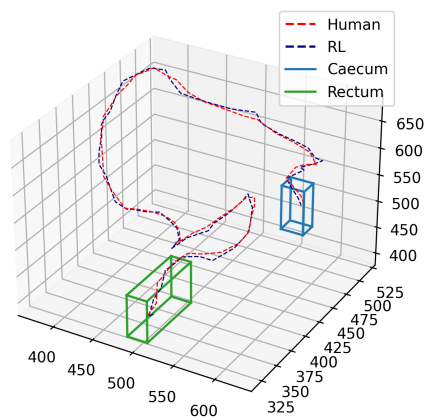

Trajectory comparison between Human and RL for TotalSegmentator s1394 case

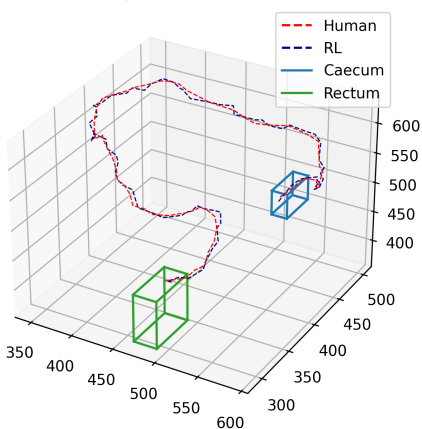

Trajectory comparison between Human and RL for TotalSegmentator s1395 case

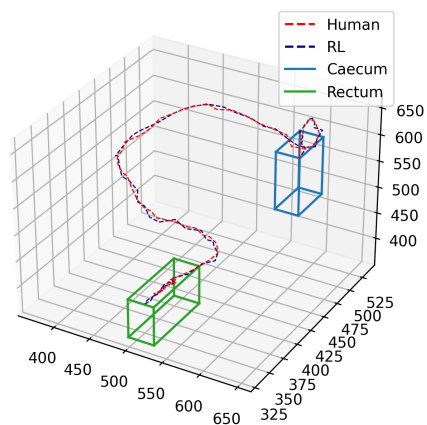

Trajectory comparison between Human and RL for TotalSegmentator s1403 case

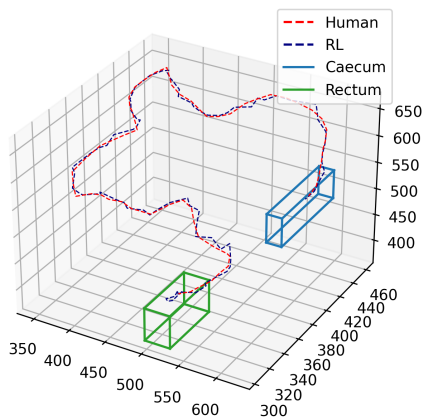

Figure 30: Comparison of trajectories between Human and RL agent to navigate from the rectum to the caecum for 5 cases in the held-out test set. Human and RL trajectories are plotted in red and navy dashed lines, respectively. We additionally designate the bounding box of the navigation target in green and blue for the rectum and caecum, respectively.

672 **F Mechanical Properties of Human Tissue**

673 We collate the values reported in [23] for the majority of soft tissue, [19] for bone, and [26] for the  
 674 pancreas as a dictionary in the SARAMIS source code. We summarise said values in the following  
 675 table.

| Organ           | Elastic Modulus (MPa) | Standard Deviation (MPa) | Reference |
|-----------------|-----------------------|--------------------------|-----------|
| muscle          | 1.58                  | 0.64                     | [23]      |
| brain           | 0.00366               | 0.00012                  | [23]      |
| oesophagus      | 0.004                 | 0.014                    | [23]      |
| lung            | 0.0034                | 0.002                    | [23]      |
| liver           | 0.006                 | 0.002                    | [23]      |
| 676 galbladder  | 0.641                 | 0.028                    | [23]      |
| stomach         | 0.005                 | -                        | [23]      |
| spleen          | 0.0245                | 0.006                    | [23]      |
| pancreas        | 0.002                 | 0.004                    | [26]      |
| colon           | 1.19                  | 1.23                     | [23]      |
| small bowel     | 2.69                  | 0.37                     | [23]      |
| kidney          | 41.5                  | -                        | [23]      |
| urinary bladder | 1.9                   | 0.2                      | [23]      |
| bone            | 179000                | 3900                     | [19]      |

677 **G Mesh Analysis and Resolution**

678 To better quantify the resolution for the meshes, we report the additional analyses:

- 679 • Number of vertices per mesh: We report the average number of vertices per mesh, split by  
 680 organ.
- 681 • Surface area of meshes: in mm<sup>2</sup> units, we calculate the mesh surface area as the sum of  
 682 triangular face areas through the area of each triangle.
- 683 • Average vertex density over the surface of the mesh: we additionally report the mesh density  
 684 as vertices per 1mm<sup>2</sup> by dividing the total mesh surface area by the number of vertices.

685 We report the mean number of vertices per mesh, total surface area of meshes, sorted by number of  
 686 vertices and by surface area, and mean vertex density in Figs. 31 - 34.

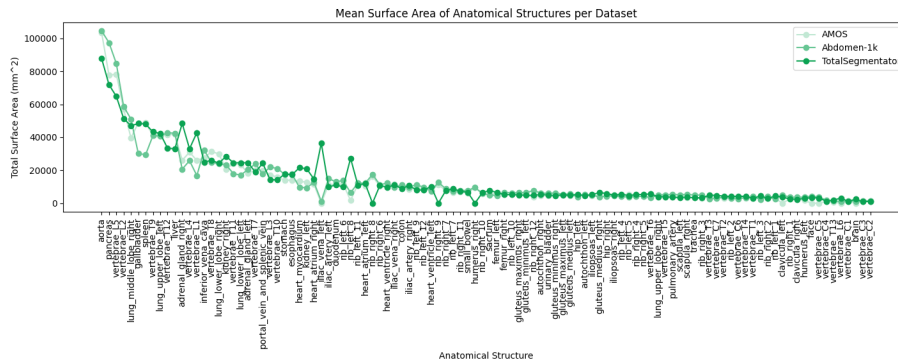

Figure 31: Mean surface area per organ sorted in descending order, split by dataset.

687 We find that the surface area shows a large level of variation, whilst the number of vertices per  
 688 organ is more homogenous. Fig. 31 shows the surface area is not necessarily correlated with size,  
 689 as the second, third, and fourth largest organs on average across datasets are the pancreas, and two  
 690 vertebral bodies (L5, and L2), which are comparatively small structures volumetrically compared  
 691 to, for example, the liver (ranked 11th), which is one of the largest internal organs of the human

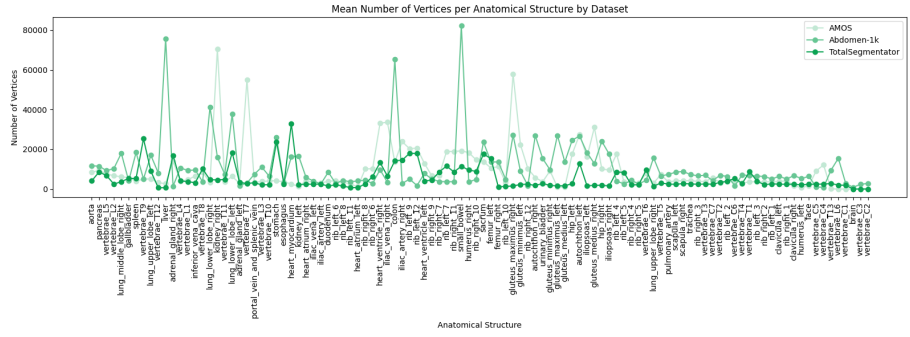

Figure 32: Mean number of vertices per organ sorted in order of largest to smallest mean surface area, split by dataset.

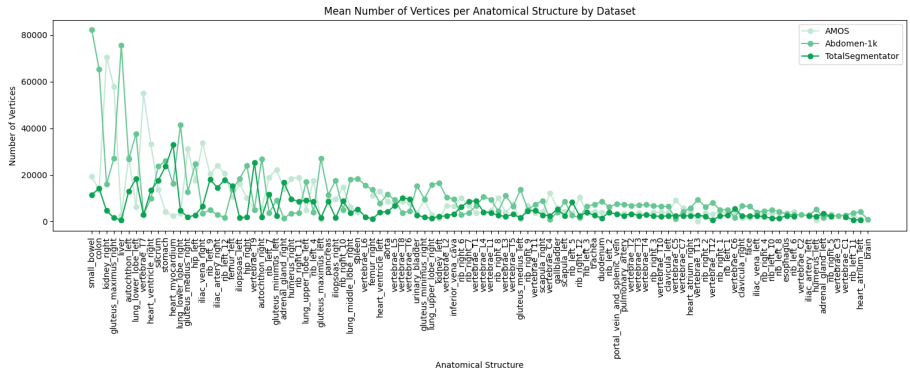

Figure 33: Mean number of vertices per organ sorted in descending order, split by dataset.

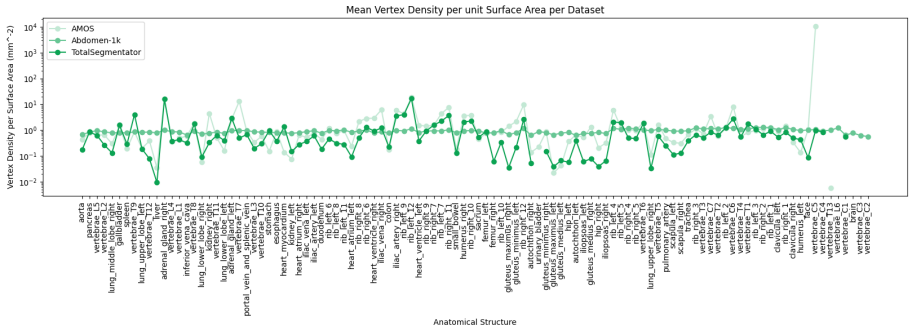

Figure 34: Mean vertex density per  $\text{mm}^2$  per organ sorted in descending order, split by dataset. For the sake of comparison, the y-axis is plotted on a log-scale.

692 anatomy. The surface area per organ is consistent amongst organ types across datasets, whilst the  
 693 number of vertices is more variant amongst datasets (Fig. 33). However, the number of vertices is  
 694 more intuitively correlated to organ size, as the small bowel, liver, colon, and gluteus are amongst  
 695 the organs with most vertices (Fig.32). We find no significant trend in the mean vertex density as  
 696 reported in Fig. 34. We find that the Abdomen-1k is the most homogenous in terms of mesh density  
 697 across organs, with the TotalSegmentator the least homogenous.

698 We recommend that future users of the dataset take care to resample the provided meshes to best suit  
 699 their use, as this may impact performance in graph-type deep learning methods or otherwise.

700 **H Labelling Analysis of Registered Colons**

701 In order to evaluate the label quality for the colon landmarking annotation, we perform a sub-analysis  
 702 of the resulting registered classification of colon centerlines with respect to manual labelling of  
 703 anatomical landmarks. We manually annotate a random sub-sample of 30 centerlines from the initial  
 704 155 colon TotalSegmentator colon subset using the same protocol as the labelling procedure for the  
 705 first template colon reported in the paper. We then compare the resulting registered indices obtained  
 706 from the deformable registration of the template for the given colons to the manual labels.

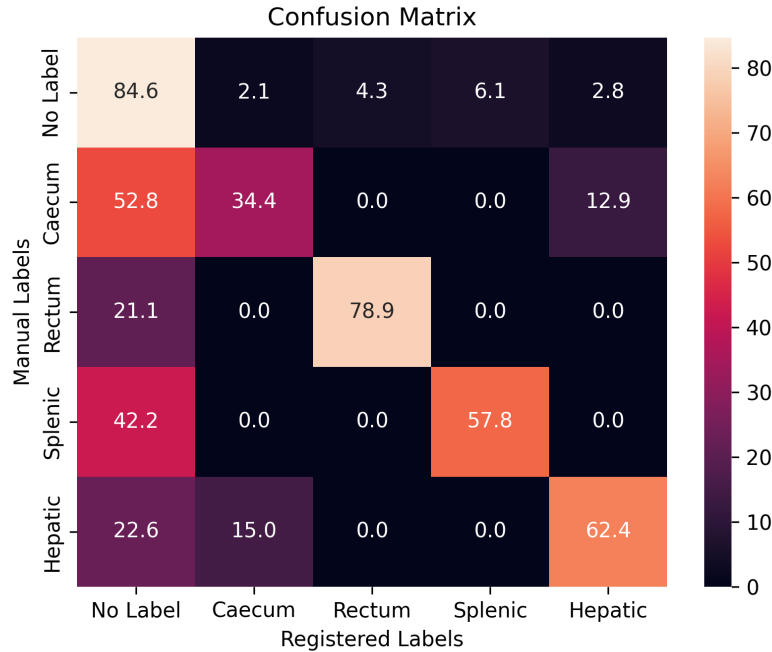

Figure 35: Confusion matrix comparing manual labelling and registration-procedure labelling for the landmark identification for colon experiments. Values for each cell are row-normalised to represent percentage of manual labels classified with a given registration label.

707 Fig. 35 shows that, for every class bar the caecum, there is a majority correct classification of the labels  
 708 from registration. Additionally, all registered landmark locations have the most class confusion with  
 709 the no-label category. This impacts the caecum most highly. The caecum landmark designates the  
 710 beginning of the large colon - however, authors chose to empirically assign a larger area from the start  
 711 of the colon towards the hepatic flexure in order to generate more general navigation targets for the  
 712 navigation task. In particular, the specific task of colonoscopy involves navigation of the endoscope  
 713 up to the visualisation of the caecum landmark, with subsequent withdrawal of the endoscope from  
 714 the colon.

715 The more significant mis-classification in this case could be attributed to the template labelling being  
 716 under-labelled in comparison to the subsequent labelled colons. The authors also note the high levels  
 717 of empirically observed anatomical variability, showcased qualitatively in Fig. 36. This, coupled with  
 718 the anatomical proximity of the caecum and hepatic flexure area(see Fig. 3A in the manuscript for  
 719 anatomical description of colon and Fig. 36 for further description), could additionally explain class  
 720 confusion between these labels.



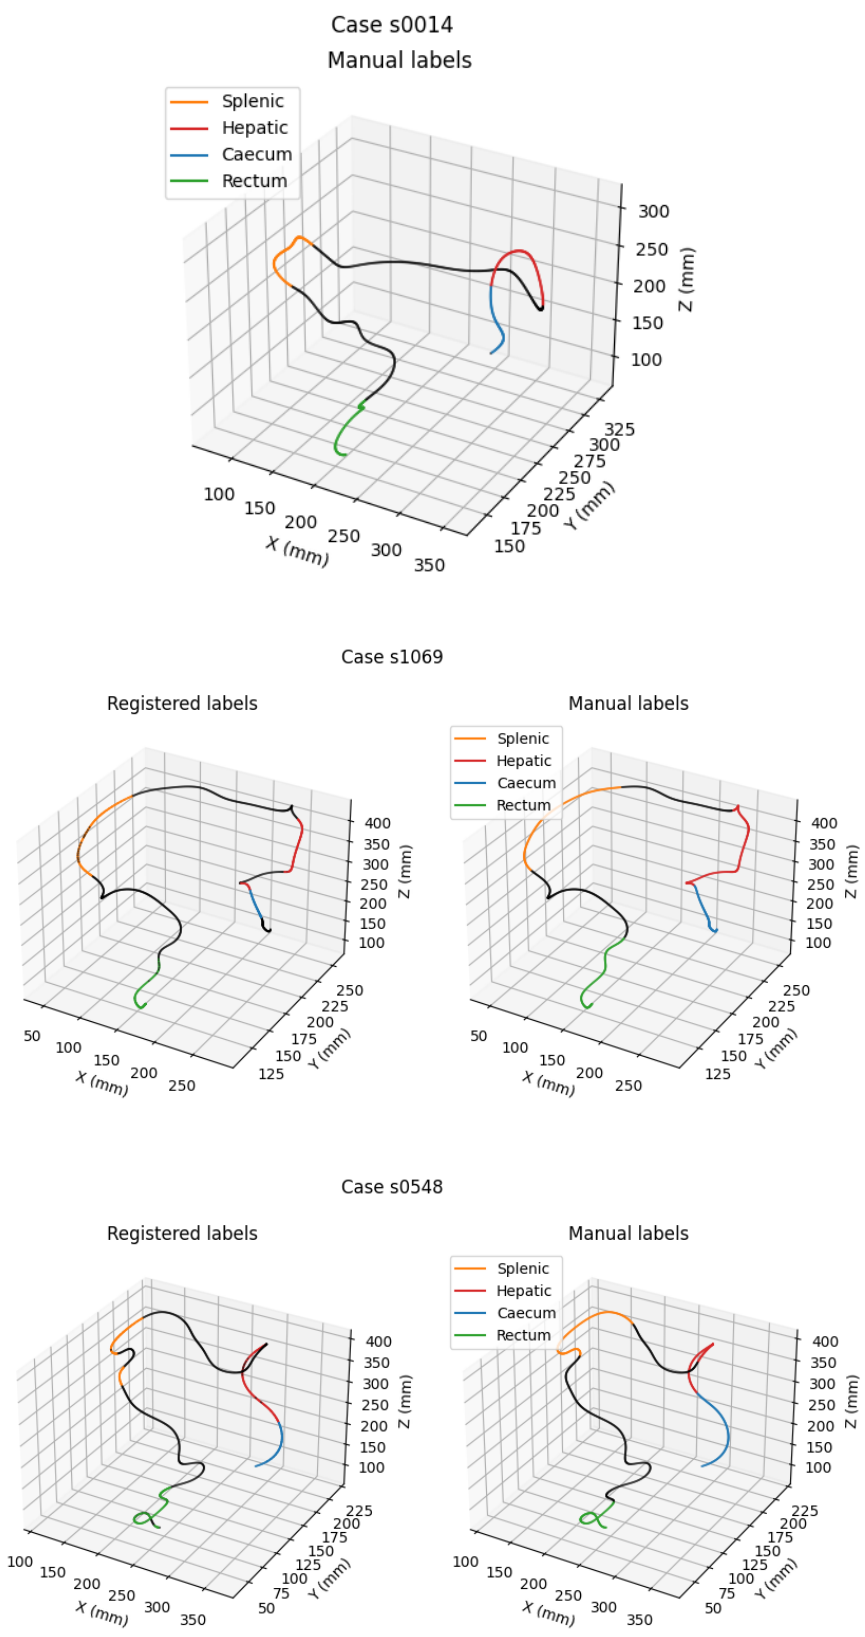

Figure 36: Comparison of labels obtained for navigation targets from manual labelling process and from template registration to case s0014 (upper panel).

721 **I Analysis of Organ Changes per Dataset**

722 We report the number of organs changed over the AMOS and Abdomen-1k datasets in Fig. 37, the  
 723 absolute mean number of pixels changed per anatomical structure in Fig. 38. as well as mean and  
 724 inter-quartile ranges for absolute number of pixels changed for all the organs split by dataset in  
 725 Tabs. 2 and 3.

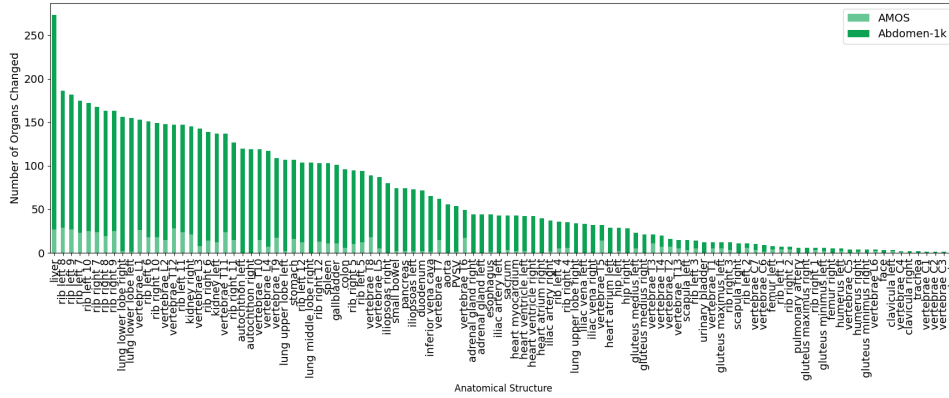

Figure 37: Number of organs changed sorted from most unique organs changed overall to least organs changed overall. We additionally split the organs by dataset.

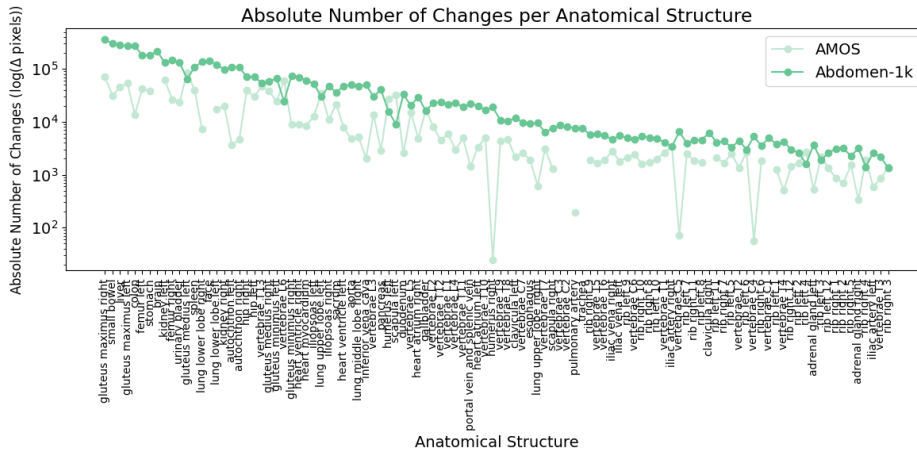

Figure 38: Absolute mean value of pixels changed per anatomical structure on a log scale for the Abdomen-1k and AMOS sub-datasets

| <b>Organ</b>                 | <b>AMOS</b>          | <b>Abdomen-1k</b>       |
|------------------------------|----------------------|-------------------------|
| spleen                       | 40254 [13726, 207]   | 107077 [169263, 713]    |
| kidney right                 | 19658 [28691, 2089]  | 97264 [115416, 4785]    |
| kidney left                  | 62477 [28905, 4720]  | 131244 [144595, 8090]   |
| gallbladder                  | 16814 [16738, 1621]  | 16029 [26273, 2714]     |
| liver                        | 45368 [12832, 55]    | 282409 [51956, 57]      |
| stomach                      | 37894 [28636, 1168]  | 181320 [262508, 1258]   |
| aorta                        | 4743 [2675, 4]       | 50423 [78268, 159]      |
| inferior vena cava           | 2044 [2313, 7]       | 49785 [73094, 100]      |
| portal vein and splenic vein | 1421 [943, 118]      | 22245 [29468, 7968]     |
| pancreas                     | 2852 [2330, 45]      | 40363 [59134, 1220]     |
| adrenal gland right          | 336 [600, 48]        | 3129 [4296, 2148]       |
| adrenal gland left           | 530 [582, 250]       | 3691 [4899, 2263]       |
| lung upper lobe left         | 34737 [172, 16]      | 29645 [30260, 25]       |
| lung lower lobe left         | 17482 [2431, 38]     | 119883 [135844, 34]     |
| lung upper lobe right        | 614 [164, 6]         | 9457 [220, 21]          |
| lung middle lobe right       | 5086 [226, 26]       | 47317 [81134, 27]       |
| lung lower lobe right        | 7288 [337, 9]        | 137421 [91826, 16]      |
| vertebrae L6                 | 60114 [69702, 50527] | 24304 [26251, 22358]    |
| vertebrae L5                 | 14911 [12573, 991]   | 20360 [24284, 1286]     |
| vertebrae L4                 | 2931 [3264, 345]     | 22896 [34428, 1674]     |
| vertebrae L3                 | 13693 [18277, 2818]  | 29953 [40274, 3182]     |
| vertebrae L2                 | 8165 [10166, 792]    | 22827 [32399, 2431]     |
| vertebrae L1                 | 5884 [6392, 574]     | 21508 [30514, 1888]     |
| vertebrae T13                | 46418 [54553, 43623] | 53719 [74064, 19380]    |
| vertebrae T12                | 4463 [6206, 916]     | 23546 [28126, 3992]     |
| vertebrae T11                | 4949 [7386, 918]     | 18956 [26029, 1496]     |
| vertebrae T10                | 4957 [5315, 742]     | 16774 [22854, 1681]     |
| vertebrae T9                 | 4295 [6719, 623]     | 10655 [17207, 1355]     |
| vertebrae T8                 | 4652 [5910, 570]     | 10156 [10454, 550]      |
| vertebrae T7                 | 3106 [3003, 343]     | 6360 [8371, 231]        |
| vertebrae T6                 | 1911 [1932, 134]     | 5572 [8153, 336]        |
| vertebrae T5                 | 1659 [964, 173]      | 5863 [7353, 518]        |
| vertebrae T4                 | 509 [605, 80]        | 4196 [7665, 781]        |
| vertebrae T3                 | 862 [816, 407]       | 2140 [1349, 221]        |
| vertebrae T2                 | 1339 [2154, 472]     | 4409 [10900, 41]        |
| vertebrae T1                 | 2623 [4109, 868]     | 4119 [6546, 1092]       |
| vertebrae C7                 | 2569 [5040, 90]      | 9632 [11294, 5442]      |
| vertebrae C6                 | 2416 [3533, 1298]    | 4649 [7724, 249]        |
| vertebrae C5                 | 72 [72, 72]          | 6502 [7568, 5313]       |
| vertebrae C4                 | 56 [56, 56]          | 5303 [5303, 5303]       |
| vertebrae C3                 | 0 [0, 0]             | 8519 [8519, 8519]       |
| vertebrae C2                 | 0 [0, 0]             | 8021 [8021, 8021]       |
| vertebrae C1                 | 0 [0, 0]             | 5017 [5017, 5017]       |
| esophagus                    | 1921 [2885, 576]     | 9182 [12522, 5390]      |
| trachea                      | 0 [0, 0]             | 7656 [10682, 4630]      |
| heart myocardium             | 8446 [10273, 94]     | 60413 [82100, 41478]    |
| heart atrium left            | 3350 [4782, 485]     | 20086 [36033, 3443]     |
| heart ventricle left         | 7722 [10418, 1099]   | 47734 [66295, 26855]    |
| heart atrium right           | 4892 [8447, 395]     | 29474 [46517, 11613]    |
| heart ventricle right        | 9008 [12538, 2281]   | 69065 [91937, 44546]    |
| pulmonary artery             | 191 [191, 191]       | 7588 [10412, 212]       |
| brain                        | 0 [0, 0]             | 216214 [216214, 216214] |
| iliac artery left            | 585 [1083, 12]       | 2623 [1942, 92]         |

Table 2: Mean [IQR:75, IQR:25] absolute pixel changes for each organ in the AMOS and Abdomen-1k subsets.

| <b>Organ</b>          | <b>AMOS</b>           | <b>Abdomen-1k</b>       |
|-----------------------|-----------------------|-------------------------|
| iliac artery right    | 3365 [5231, 2062]     | 3366 [2833, 121]        |
| iliac vena left       | 1794 [2564, 268]      | 5489 [2733, 29]         |
| iliac vena right      | 2773 [4005, 164]      | 4623 [2656, 108]        |
| small bowel           | 31206 [8907, 624]     | 299051 [435509, 1652]   |
| duodenum              | 2546 [2394, 24]       | 32777 [49035, 298]      |
| colon                 | 13696 [6763, 68]      | 274284 [392699, 66]     |
| rib left 1            | 1246 [1556, 544]      | 3725 [4580, 3149]       |
| rib left 2            | 1676 [1156, 667]      | 2597 [3174, 1409]       |
| rib left 3            | 2149 [1365, 266]      | 1874 [3145, 259]        |
| rib left 4            | 2673 [2994, 213]      | 1594 [1970, 332]        |
| rib left 5            | 2528 [2367, 656]      | 3279 [3031, 712]        |
| rib left 6            | 2653 [4012, 609]      | 3005 [3780, 713]        |
| rib left 7            | 2459 [2278, 201]      | 3927 [5692, 857]        |
| rib left 8            | 1729 [1620, 358]      | 4560 [5656, 950]        |
| rib left 9            | 2111 [2796, 292]      | 4986 [6648, 942]        |
| rib left 10           | 1986 [3337, 222]      | 4778 [6532, 799]        |
| rib left 11           | 2089 [2948, 595]      | 4097 [6350, 748]        |
| rib left 12           | 1344 [1756, 356]      | 2614 [3305, 925]        |
| rib right 1           | 850 [1090, 631]       | 3078 [3790, 2210]       |
| rib right 2           | 699 [813, 603]        | 3152 [4710, 1852]       |
| rib right 3           | 1366 [808, 363]       | 1353 [1755, 566]        |
| rib right 4           | 1906 [3596, 307]      | 1406 [2105, 247]        |
| rib right 5           | 1525 [2240, 368]      | 2248 [3100, 750]        |
| rib right 6           | 1825 [2680, 701]      | 3484 [4009, 873]        |
| rib right 7           | 1672 [2864, 464]      | 4279 [5847, 764]        |
| rib right 8           | 1719 [2349, 400]      | 5067 [7190, 1008]       |
| rib right 9           | 1919 [2322, 495]      | 5715 [8588, 941]        |
| rib right 10          | 1588 [2900, 83]       | 5383 [8037, 648]        |
| rib right 11          | 1817 [2271, 280]      | 4514 [6433, 656]        |
| rib right 12          | 1432 [1678, 344]      | 3002 [3400, 928]        |
| humerus left          | 26854 [30282, 23425]  | 15797 [23688, 970]      |
| humerus right         | 25 [29, 14]           | 18858 [28272, 2188]     |
| scapula left          | 32167 [46963, 17]     | 9068 [10483, 936]       |
| scapula right         | 1293 [1552, 924]      | 7481 [6704, 204]        |
| clavicula left        | 2162 [3236, 94]       | 11974 [11974, 11974]    |
| clavicula right       | 0 [0, 0]              | 6196 [9209, 3184]       |
| femur left            | 42400 [85472, 3962]   | 180016 [227985, 106850] |
| femur right           | 26289 [36045, 19586]  | 145451 [193543, 102826] |
| hip left              | 29813 [35163, 3772]   | 71961 [27042, 3071]     |
| hip right             | 39340 [76328, 690]    | 70342 [29356, 1914]     |
| sacrum                | 21541 [36350, 986]    | 35899 [23639, 1036]     |
| face                  | 0 [0, 0]              | 144310 [216377, 446]    |
| gluteus maximus left  | 54101 [99168, 5099]   | 271042 [466883, 589]    |
| gluteus maximus right | 70083 [104624, 15570] | 358701 [590127, 66084]  |
| gluteus medius left   | 85769 [160655, 14631] | 64736 [45730, 377]      |
| gluteus medius right  | 37802 [48854, 30561]  | 57151 [33615, 183]      |
| gluteus minimus left  | 24065 [56203, 1229]   | 67576 [94469, 31866]    |
| gluteus minimus right | 8872 [12980, 6596]    | 74194 [105394, 35438]   |
| autochthon left       | 3668 [47, 7]          | 109548 [188674, 6]      |
| autochthon right      | 4593 [48, 8]          | 107824 [180978, 12]     |
| iliopsoas left        | 12756 [9840, 6]       | 52243 [59470, 8]        |
| iliopsoas right       | 10963 [850, 19]       | 47540 [61348, 11]       |
| urinary bladder       | 23455 [20369, 3434]   | 131854 [121914, 275]    |

Table 3: Mean [IQR:75, IQR:25] absolute pixel changes for each organ in the AMOS and Abdomen-1k subsets.

## 726 J Reinforcement Learning Training Algorithm

727 The training procedure to obtain an optimised policy  $\pi_{\theta^*}$  which maximises the cumulative reward,  
728 representative of navigation performance, is summarised in Algo. 2. After training, this policy may  
729 be used to perform navigation intraoperatively.

**Data:** Patient volumes from which to sample camera images  $s_t \in \mathcal{S}$

**Result:** Trained RL policy  $\pi_{\theta^*}$ .

**while** *not converged* **do**

    Randomly sample a patient volume;

    Start at  $t = 0$ ;

    Randomly sample a camera pose  $c_0 \in \mathbb{R}^6$  within the volume;

    Render the camera image  $s_0$  at pose  $c_0$ ;

    Sample the action  $a_0$  according to the policy  $a_0 \sim \pi_{\theta}(a_0|s_0)$ ;

    Compute target-presence-based reward  $R_0 = r(s_0, a_0)$ ;

**for**  $t \leftarrow 1$  **to**  $T$  **do**

        Note:  $t$  is now iterating starting at  $t = 1$ ;

        Update the camera pose  $c_t = c_{t-1} + a_{t-1}$ ;

        Render the camera image  $s_t$  at pose  $c_t$ ;

        Sample the action  $a_t$  according to the policy  $a_t \sim \pi_{\theta}(a_t|s_t)$ ;

        Compute target-presence-based reward  $R_t = r(s_t, a_t)$ ;

        End if target presence detected i.e., at  $t_{end}$ ;

**end**

    Once  $R_{t=1:T}$  or  $R_{t=1:t_{end}}$  collected, update RL function using gradient ascent

**end**

**Algorithm 2:** Training procedure to train a navigation policy using reinforcement learning.

## 730 References

- 731 [1] H. Borgli, V. Thambawita, P. H. Smedsrud, S. Hicks, D. Jha, S. L. Eskeland, K. R. Randel,  
732 K. Pogorelov, M. Lux, D. T. D. Nguyen, et al. Hyperkvasir, a comprehensive multi-class image  
733 and video dataset for gastrointestinal endoscopy. *Scientific data*, 7(1):283, 2020.
- 734 [2] A. Buia, F. Stockhausen, and E. Hanisch. Laparoscopic surgery: A qualified systematic review.  
735 *World journal of methodology*, 5(4):238, 2015.
- 736 [3] M. Carstens, F. M. Rinner, S. Bodenstedt, A. C. Jenke, J. Weitz, M. Distler, S. Speidel, and F. R.  
737 Kolbinger. The dresden surgical anatomy dataset for abdominal organ segmentation in surgical  
738 data science. *Scientific Data*, 10(1):1–8, 2023.
- 739 [4] F. Chadebecq, L. B. Lovat, and D. Stoyanov. Artificial intelligence and automation in endoscopy  
740 and surgery. *Nature Reviews Gastroenterology & Hepatology*, 20(3):171–182, 2023.
- 741 [5] Z. Chen, A. Deguet, R. Taylor, S. DiMaio, G. Fischer, and P. Kazanzides. An open-source  
742 hardware and software platform for telesurgical robotics research. In *Proceedings of the MICCAI*  
743 *Workshop on Systems and Architecture for Computer Assisted Interventions, Nagoya, Japan*,  
744 volume 2226, 2013.
- 745 [6] T. Cheng, T. Liu, G. Zhang, X. Peng, and X. Zhang. Does minimally invasive surgery improve  
746 short-term recovery in total knee arthroplasty? *Clinical Orthopaedics and Related Research*®,  
747 468:1635–1648, 2010.
- 748 [7] J. Gehrman, E. Angenete, I. Björholt, E. Lesén, and E. Haglund. Cost-effectiveness analysis of  
749 laparoscopic and open surgery in routine swedish care for colorectal cancer. *Surgical endoscopy*,  
750 34:4403–4412, 2020.

- 751 [8] A. Geiger, P. Lenz, and R. Urtasun. Are we ready for autonomous driving? the kitti vision  
752 benchmark suite. In *2012 IEEE conference on computer vision and pattern recognition*, pages  
753 3354–3361. IEEE, 2012.
- 754 [9] A. A. Gumbs, F. Alexander, K. Karcz, E. Chouillard, R. Croner, J. Coles-Black, B. de Simone,  
755 M. Gagner, B. Gayet, V. Grasso, et al. White paper: definitions of artificial intelligence and  
756 autonomous actions in clinical surgery. *Artificial Intelligence Surgery*, 2(2):93–100, 2022.
- 757 [10] Y. Hu, T. Schneider, B. Wang, D. Zorin, and D. Panozzo. Fast tetrahedral meshing in the wild.  
758 *ACM Trans. Graph.*, 39(4), July 2020.
- 759 [11] S. Jacob, I. A. Makey, M. M. El-Sayed Ahmed, J. M. Mallea, D. B. Erasmus, and E. V. Belli.  
760 Transplantation of a three-lobed donor left lung: A case report. *SAGE Open Medical Case*  
761 *Reports*, 7:2050313X19834155, 2019.
- 762 [12] Y. Ji, H. Bai, C. Ge, J. Yang, Y. Zhu, R. Zhang, Z. Li, L. Zhanng, W. Ma, X. Wan, et al. Amos:  
763 A large-scale abdominal multi-organ benchmark for versatile medical image segmentation.  
764 *Advances in Neural Information Processing Systems*, 35:36722–36732, 2022.
- 765 [13] B. D. Killeen, S. M. Cho, M. Armand, R. H. Taylor, and M. Unberath. In silico simulation: A  
766 key enabling technology for next-generation intelligent surgical systems. *Progress in Biomedical*  
767 *Engineering*, 2023.
- 768 [14] L. Lin, Y. Liu, Y. Hu, X. Yan, K. Xie, and H. Huang. Capturing, reconstructing, and simulating:  
769 the urbanscene3d dataset. In *Computer Vision–ECCV 2022: 17th European Conference, Tel*  
770 *Aviv, Israel, October 23–27, 2022, Proceedings, Part VIII*, pages 93–109. Springer, 2022.
- 771 [15] J. Ma, Y. Zhang, S. Gu, C. Zhu, C. Ge, Y. Zhang, X. An, C. Wang, Q. Wang, X. Liu, et al.  
772 Abdomenct-1k: Is abdominal organ segmentation a solved problem? *IEEE Transactions on*  
773 *Pattern Analysis and Machine Intelligence*, 44(10):6695–6714, 2021.
- 774 [16] E. C. K. MD. The internet pathology laboratory for medical education: Endocrine pathol-  
775 ogy: Adrenal glands. <https://webpath.med.utah.edu/ENDOHTML/ENDO0001.html>, 2023.  
776 [Accessed 12-Jun-2023].
- 777 [17] V. Minutolo, A. Licciardello, B. Di Stefano, M. Arena, G. Arena, and V. Antonacci. Outcomes  
778 and cost analysis of laparoscopic versus open appendectomy for treatment of acute appendicitis:  
779 4-years experience in a district hospital. *BMC surgery*, 14(1):1–6, 2014.
- 780 [18] K. Mohiuddin and S. J. Swanson. Maximizing the benefit of minimally invasive surgery. *Journal*  
781 *of surgical oncology*, 108(5):315–319, 2013.
- 782 [19] E. F. Morgan, G. U. Unnikrisnan, and A. I. Hussein. Bone mechanical properties in healthy and  
783 diseased states. *Annual review of biomedical engineering*, 20:119–143, 2018.
- 784 [20] G. Paulin and M. Ivasic-Kos. Review and analysis of synthetic dataset generation methods and  
785 techniques for application in computer vision. *Artificial Intelligence Review*, pages 1–45, 2023.
- 786 [21] PIXXO3D. Tutorial: Procedural Bone Material | Blender 3.5 — youtube.com. [https://www.](https://www.youtube.com/watch?v=Wk7a1hK2lyI)  
787 [youtube.com/watch?v=Wk7a1hK2lyI](https://www.youtube.com/watch?v=Wk7a1hK2lyI), 2023. [Accessed 12-Jun-2023].
- 788 [22] H. Saeidi, J. D. Opfermann, M. Kam, S. Wei, S. Léonard, M. H. Hsieh, J. U. Kang, and  
789 A. Krieger. Autonomous robotic laparoscopic surgery for intestinal anastomosis. *Science*  
790 *robotics*, 7(62):eabj2908, 2022.
- 791 [23] G. Singh and A. Chanda. Mechanical properties of whole-body soft human tissues: A review.  
792 *Biomedical Materials*, 16(6):062004, 2021.
- 793 [24] J. A. Śmigielski, Ł. Piskorz, and W. Koptas. Comparison of treatment costs of laparoscopic and  
794 open surgery. *Videosurgery and Other Miniinvasive Techniques*, 10(3):437–441, 2015.

- 795 [25] J. Straub, T. Whelan, L. Ma, Y. Chen, E. Wijmans, S. Green, J. J. Engel, R. Mur-Artal, C. Ren,  
796 S. Verma, et al. The replica dataset: A digital replica of indoor spaces. *arXiv preprint*  
797 *arXiv:1906.05797*, 2019.
- 798 [26] M. Sugimoto, S. Takahashi, M. Kojima, N. Gotohda, Y. Kato, S. Kawano, A. Ochiai, and  
799 M. Konishi. What is the nature of pancreatic consistency? assessment of the elastic modulus of  
800 the pancreas and comparison with tactile sensation, histology, and occurrence of postoperative  
801 pancreatic fistula after pancreaticoduodenectomy. *Surgery*, 156(5):1204–1211, 2014.
- 802 [27] T. Tarin, A. Feifer, S. Kimm, L. Chen, D. Sjoberg, J. Coleman, and P. Russo. Impact of a  
803 common clinical pathway on length of hospital stay in patients undergoing open and minimally  
804 invasive kidney surgery. *The Journal of urology*, 191(5):1225–1230, 2014.
- 805 [28] D. M. Tsai, A. Norwich, E. Saberski, and D. Narayan. 2.6 - common regional flaps. In J. Chang,  
806 editor, *Global Reconstructive Surgery*, pages 100–116. Elsevier, London, 2019.
- 807 [29] A. P. Twinanda, S. Shehata, D. Mutter, J. Marescaux, M. De Mathelin, and N. Padoy. Endonet:  
808 a deep architecture for recognition tasks on laparoscopic videos. *IEEE transactions on medical*  
809 *imaging*, 36(1):86–97, 2016.
- 810 [30] J. Wasserthal, M. Meyer, H.-C. Breit, J. Cyriac, S. Yang, and M. Segeroth. Totalsegmentator:  
811 robust segmentation of 104 anatomical structures in ct images. *arXiv preprint arXiv:2208.05868*,  
812 2022.
- 813 [31] I. J. Y. Wee, L.-J. Kuo, and J. C.-Y. Ngu. A systematic review of the true benefit of robotic  
814 surgery: Ergonomics. *The International Journal of Medical Robotics and Computer Assisted*  
815 *Surgery*, 16(4):e2113, 2020.
